# Supplementary material for: Insight into the solvent effects on ethanol oxidation on Ir(100)
Source: Royal Society of Chemistry journal article supplement (doi:10.1039/d2cp04899j), 2022-12-12
Supplement: d2cp04899j1.pdf [file d2cp04899j1.pdf]

## *Supporting Information*

### Insight into the solvent effects on ethanol oxidation on Ir(100)

Ruitao Wu, Lichang Wang\*

School of Chemical and Biomolecular Sciences and the Materials Technology Center,  
Southern Illinois University, Carbondale, Illinois 62901, United States

## Table of contents

|                                                        |     |
|--------------------------------------------------------|-----|
| 1. Supplementary tables and figures .....              | S2  |
| 2. Coordinates of transition states in this work ..... | S17 |

## 1. Supplementary tables and figures

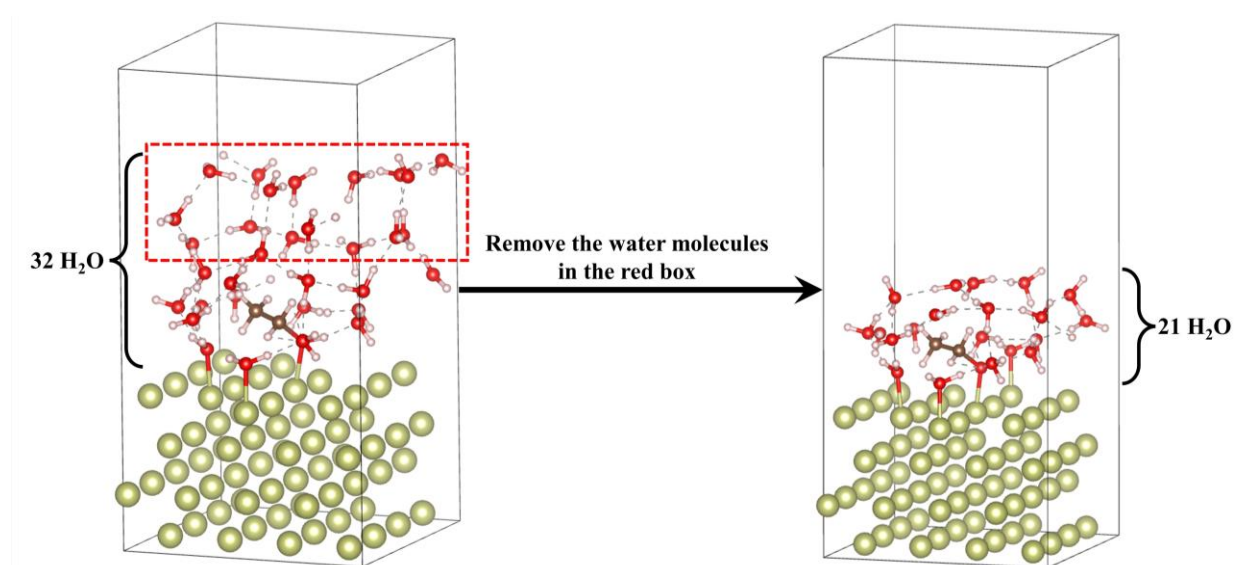

**Fig. S1** The trans-ethanol adsorption configurations in the explicit solvation model with 32 (left) and 21 (right) water molecules, respectively.

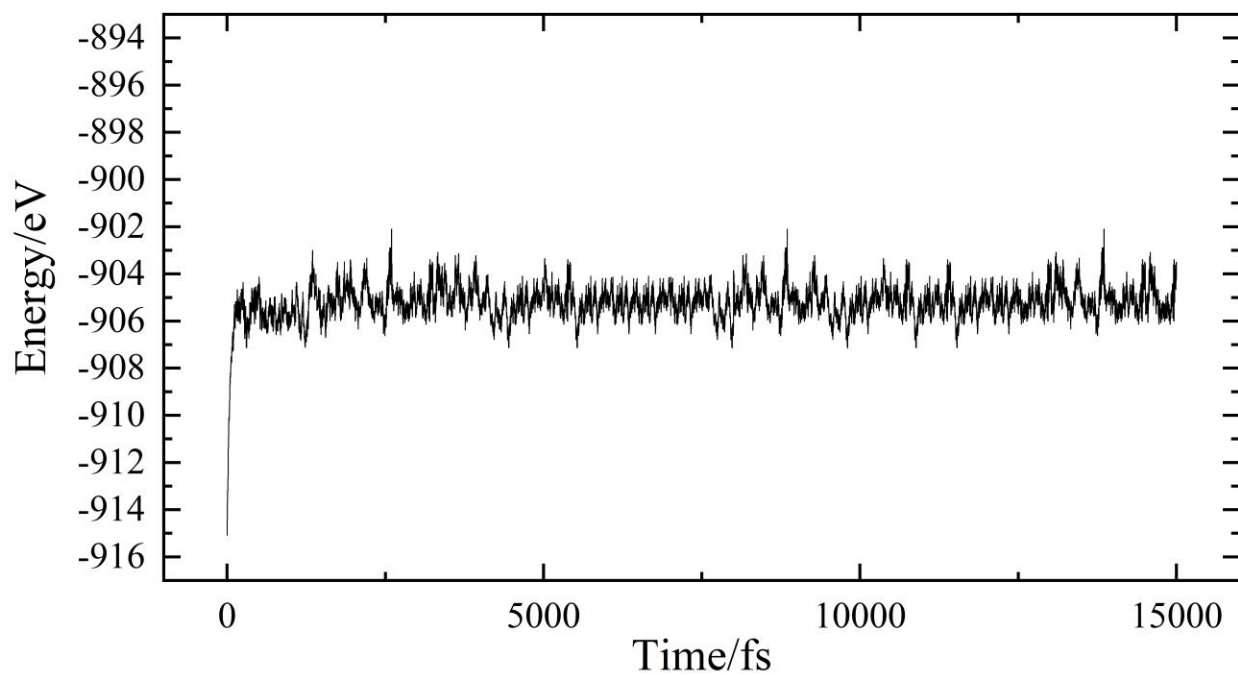

**Fig. S2** The total energy fluctuation of an AIMD trajectory of the adsorbed trans-ethanol in the 21-H<sub>2</sub>O-containing system at ~300 K.

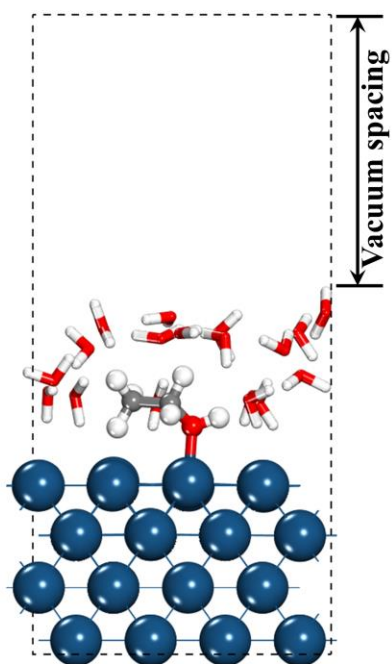

| Vacuum spacing/Å | DFT energy/eV |
|------------------|---------------|
| 5                | -1078.7187    |
| 6                | -1078.9489    |
| 10               | -1078.7551    |
| 11               | -1078.7344    |
| 12               | -1078.7232    |
| 15               | -1078.7014    |

**Fig. S3** The vacuum spacing in the explicit model and the system energies at various vacuum spacing

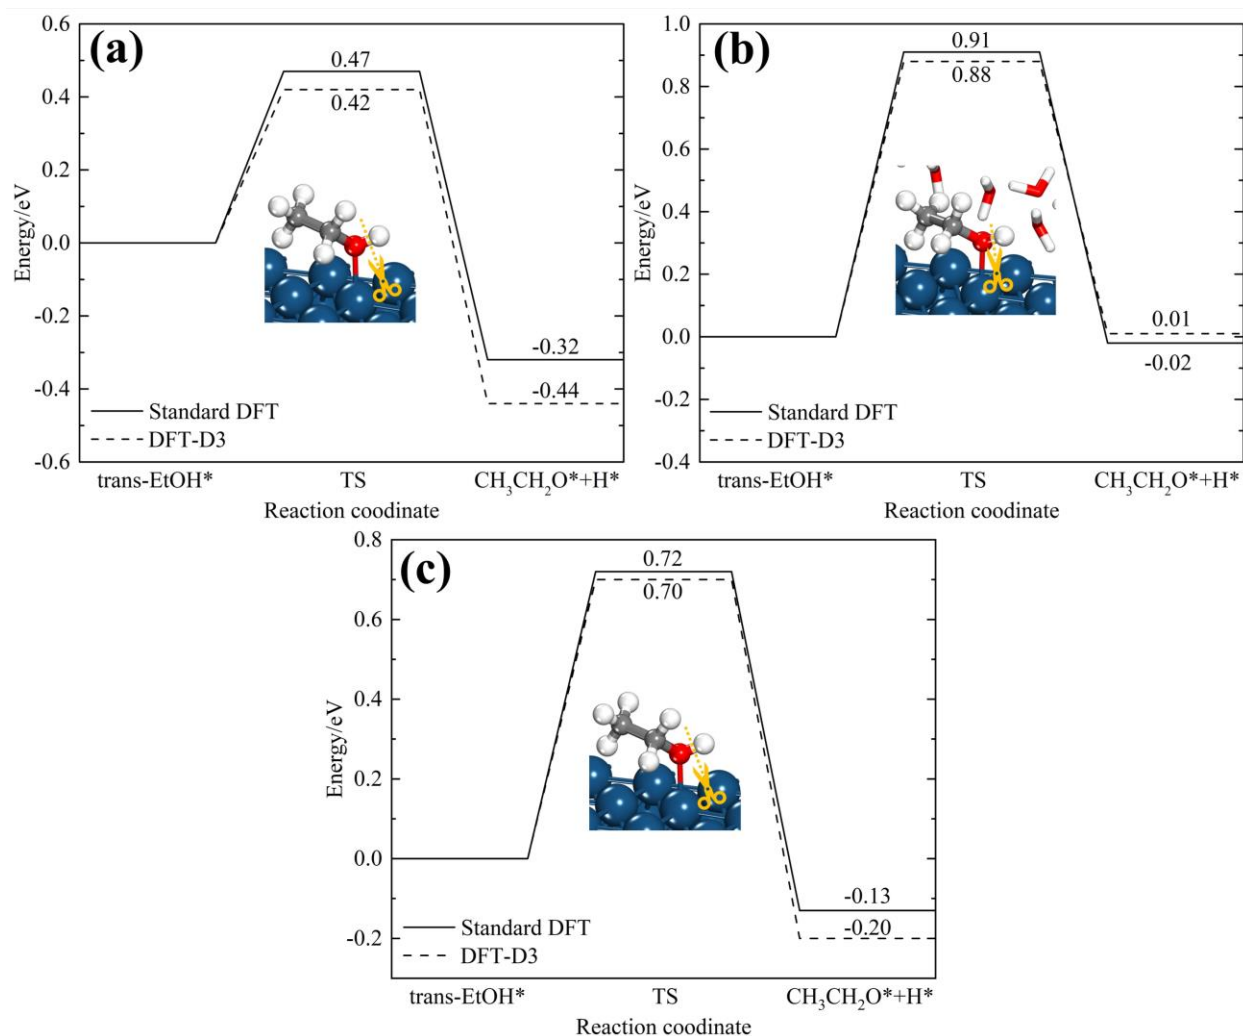

**Fig. S4** Potential energy diagrams for the ethanol's O-H cleavage in the (a) gas-phase, (b) explicit, and (c) implicit (VASPsol) models using the standard DFT and DFT-D3 methods.

**Table S1.** A comparison of the calculation time of vibrational frequencies of two ethanol adsorption structures (gas-phase vs. explicit) using different DFT methods.

| Studied model                         | DFT method   | The number of calculated frequencies | Calculation time/h |
|---------------------------------------|--------------|--------------------------------------|--------------------|
| Trans-EtOH+Ir(100)                    | Standard DFT | 75                                   | 5.0                |
| Trans-EtOH+Ir(100)                    | VASPsol      | 75                                   | 13.6               |
| Trans-EtOH+Ir(100)                    | DFT-D3       | 75                                   | 5.2                |
| Trans-EtOH+21H <sub>2</sub> O+Ir(100) | Standard DFT | 264                                  | 24.4               |
| Trans-EtOH+21H <sub>2</sub> O+Ir(100) | DFT-D3       | 264                                  | 24.7               |

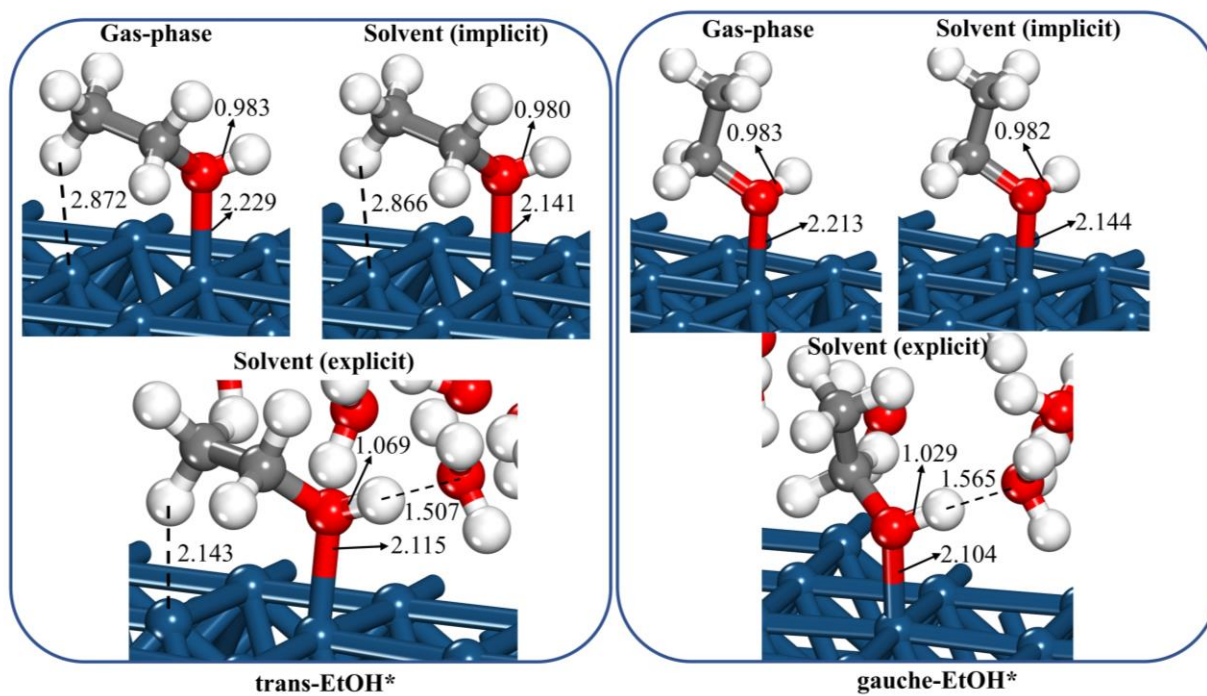

**Fig. S5** The adsorption configurations of trans-ethanol (left) and gauche-ethanol (right) in the gas phase, implicit solvation, and explicit solvation models

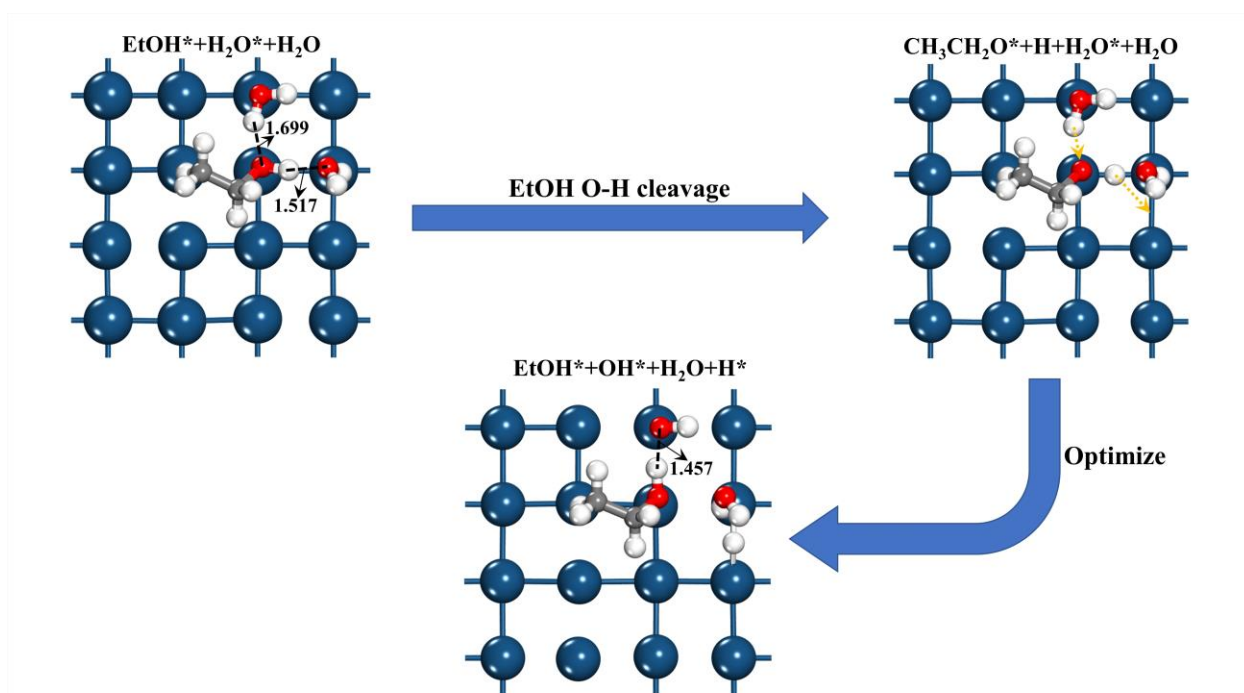

**Fig. S6** Top view of the H-transfer process for the adsorbed trans-ethanol with two H-bonded (EW and WE) water molecules in the explicit model (the other 19  $\text{H}_2\text{O}$  molecules were not displayed here).

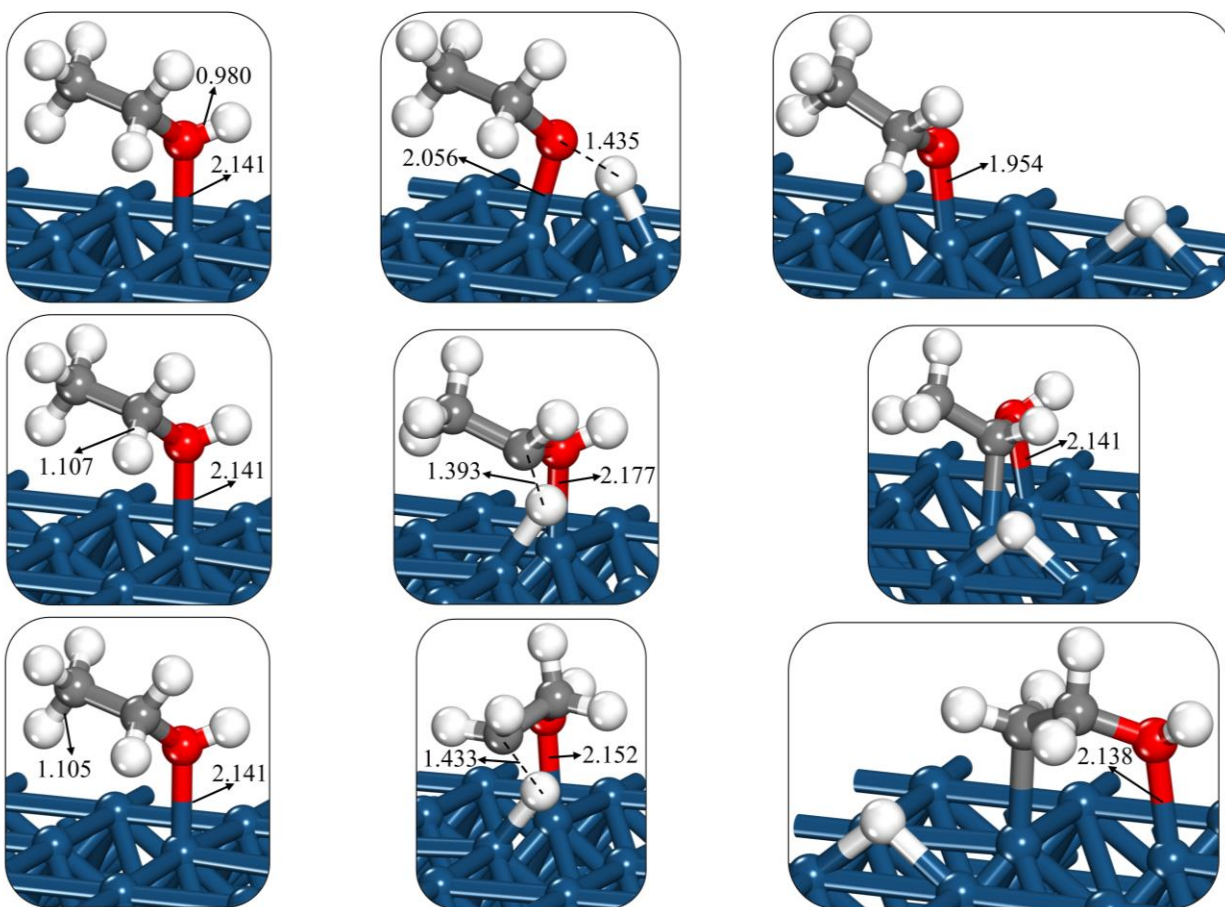

**Fig. S7** The ISs (left), TSs (middle), and FSs (right) with distances in Å for R1, R2, and R3 (from top to bottom) in the implicit model, respectively.



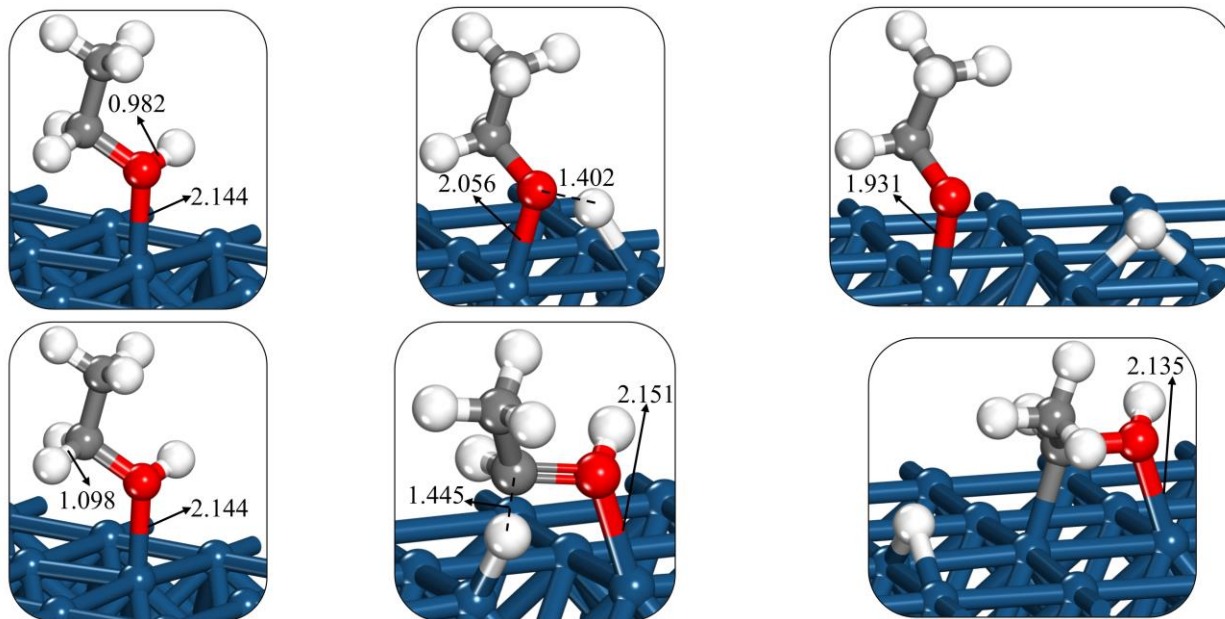

**Fig. S8** The ISs (left), TSs (middle), and FSs (right) with distances in Å for R4 (top) and R5 (bottom) in the implicit model, respectively.

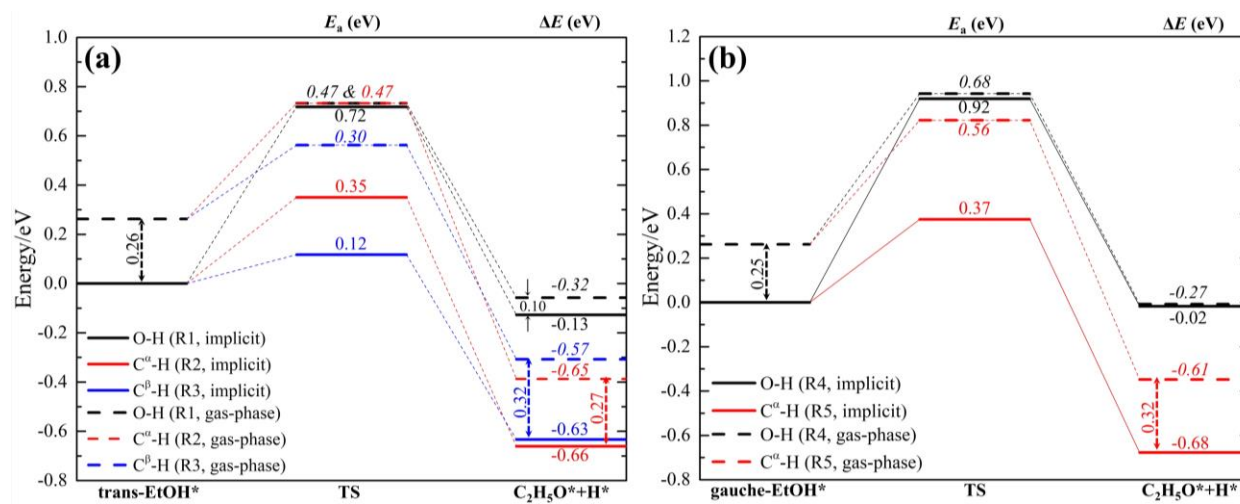

**Fig. S9** Potential energy diagrams for the dehydrogenation reactions of (a) trans-ethanol and (b) gauche-ethanol adsorption structures in the gas-phase and implicit solvent models.



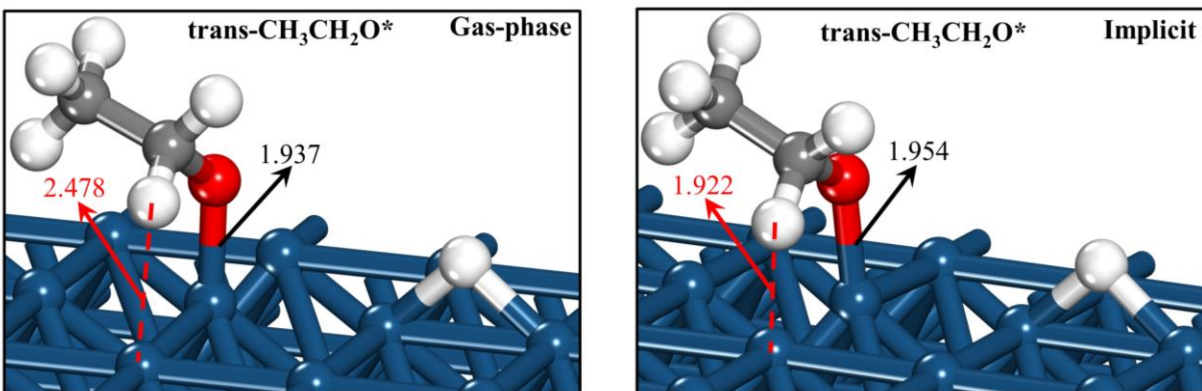

**Fig. S10** The FS structures of trans-ethanol hydroxyl dehydrogenation in the gas-phase (left) and implicit (right) models.

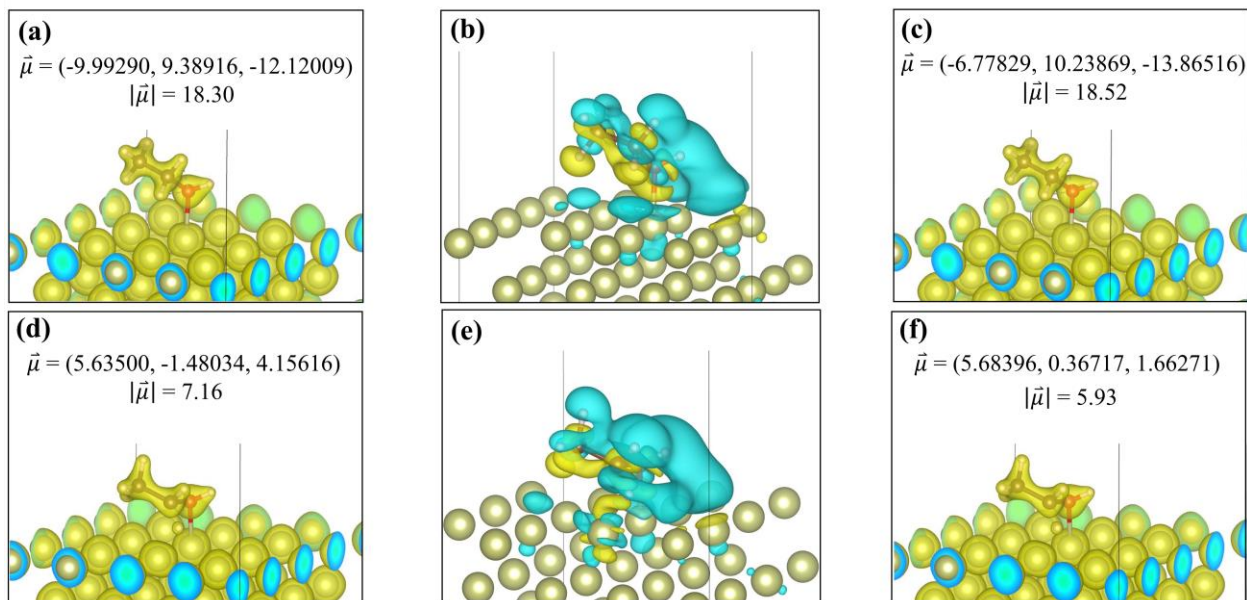

**Fig. S11** The charge density contour of R3's IS (a and c) and TS (d and f) and the CCD isosurface for R3's IS (b) and TS (e) between standard DFT and VASPsol. Note: the contour (a) and (d) were calculated using the standard DFT, and the contour (c) and (f) were calculated using the VASPsol code.  $\vec{\mu}$  and  $|\vec{\mu}|$  denote the total electronic dipole moment of the system and its length, respectively.

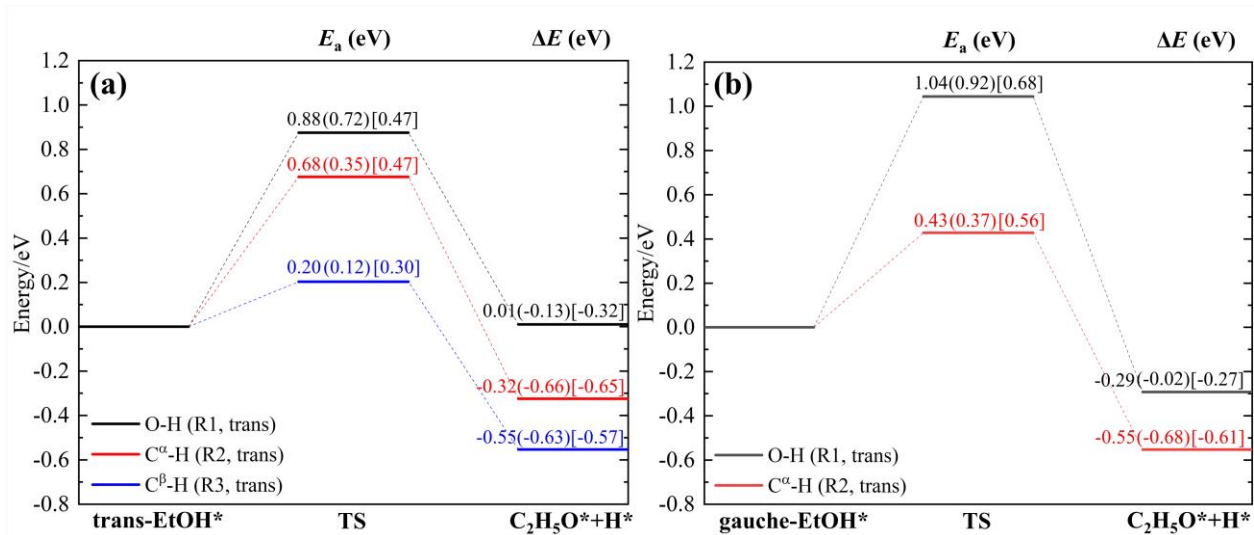

**Fig. S12** Potential energy diagrams for the dehydrogenation reactions of (a) trans-ethanol and (b) gauche-ethanol adsorption structures in the explicit solvation model. The data in parentheses and square brackets denote the data ( $E_a$  and  $\Delta E$ ) from implicit and gas-phase models, respectively.

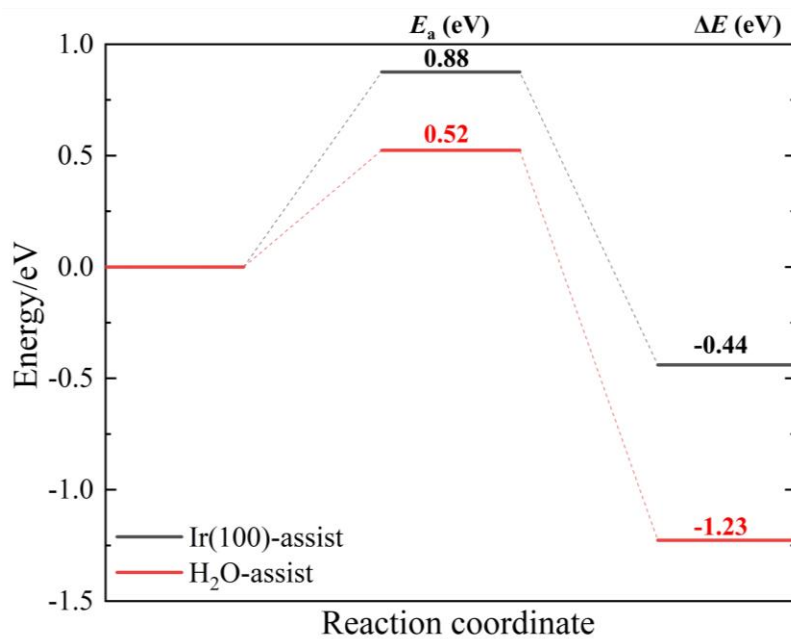

**Fig. S13** Potential energy diagrams for the O-H dehydrogenations on Ir(100) in gas phase [Ir(100)-assist] and in solution [H<sub>2</sub>O-assist] at a potential of 0.45 V (vs RHE).

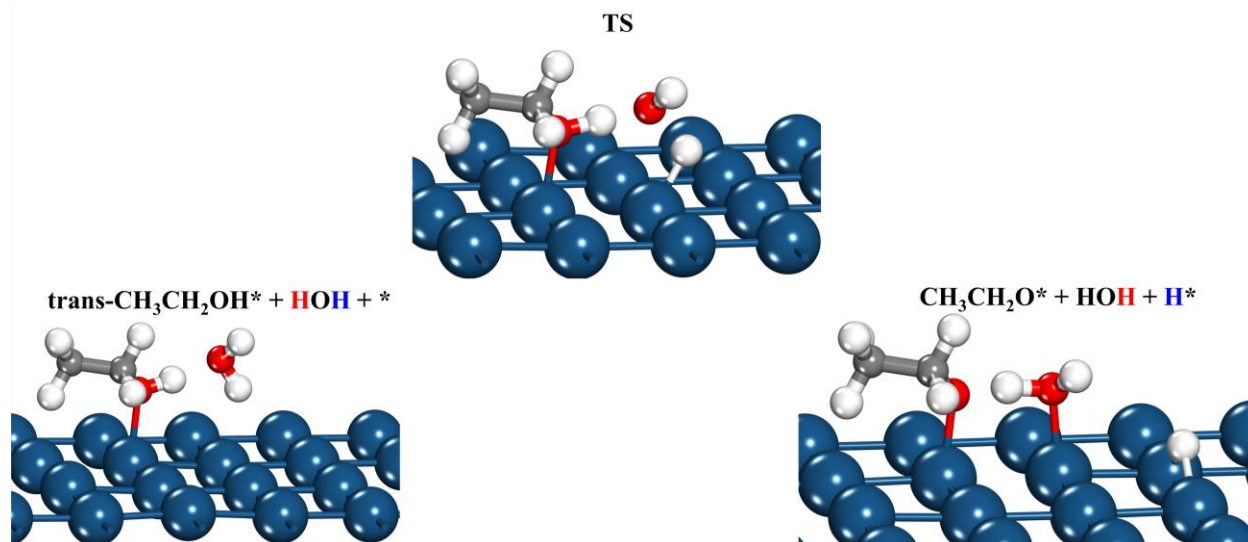

**Fig. S14** IS (left), TS (middle), and FS (right) with distances in Å for the H<sub>2</sub>O-assist O-H dehydrogenation of trans-ethanol in the explicit model (the other 20 water molecules were not visualized).

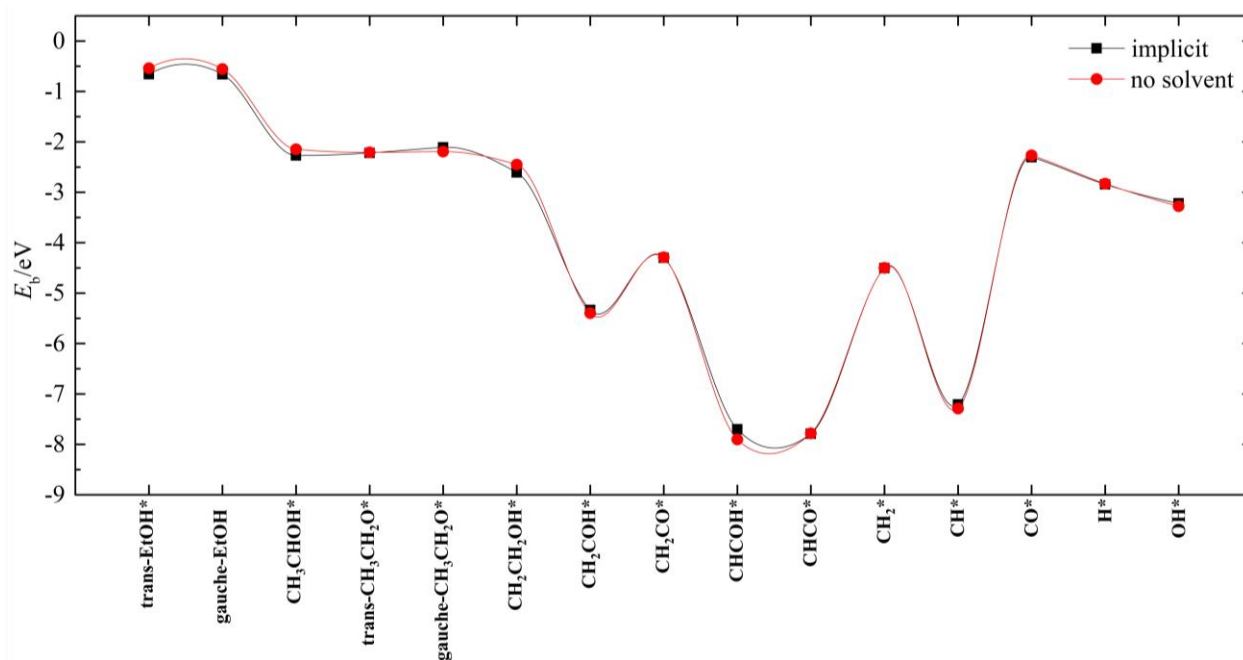

**Fig. S15** Calculated binding energies of some relevant species in the gas phase and the implicit model.

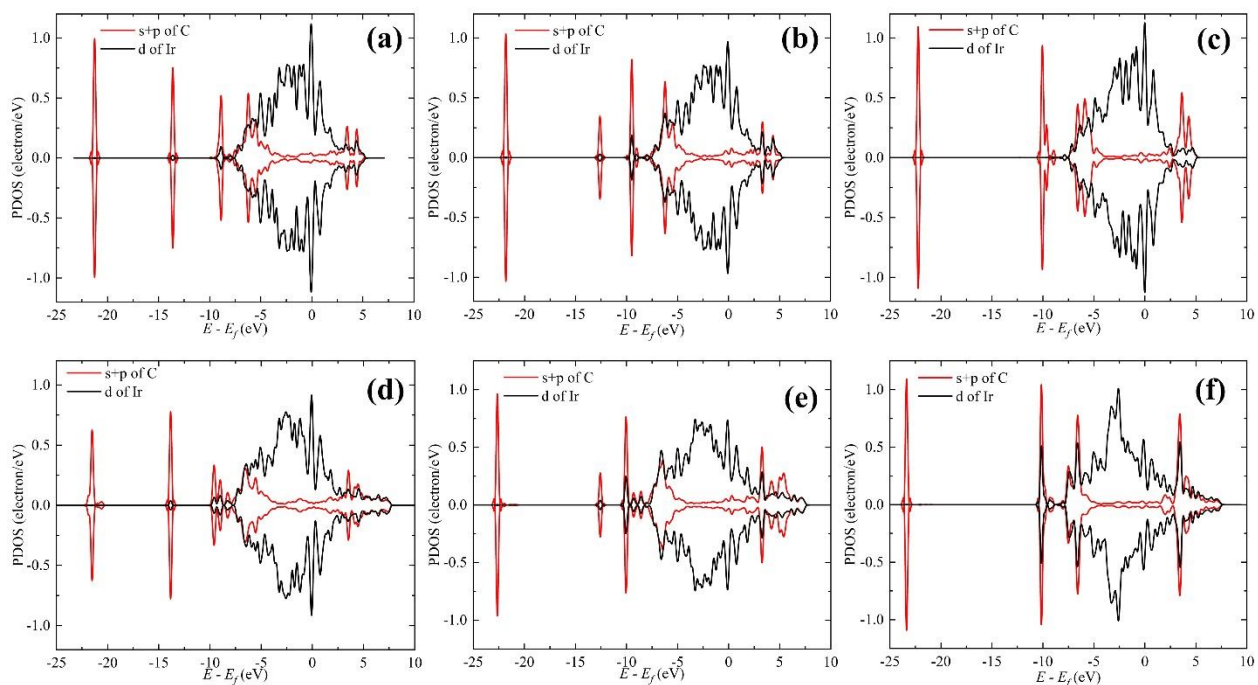

**Fig. S16** (s+p)-projected density of state (PDOS) plots for the C in CO of CHCO and d-projected DOS plots for the C's nearest binding Ir. (a), (b), and (c) are the PDOS plots of the IS, TS, and FS of R7 in the gas phase, respectively; (d), (e), and (f) are the PDOS plots of the IS, TS, and FS of R7 in the explicit solvation, respectively.

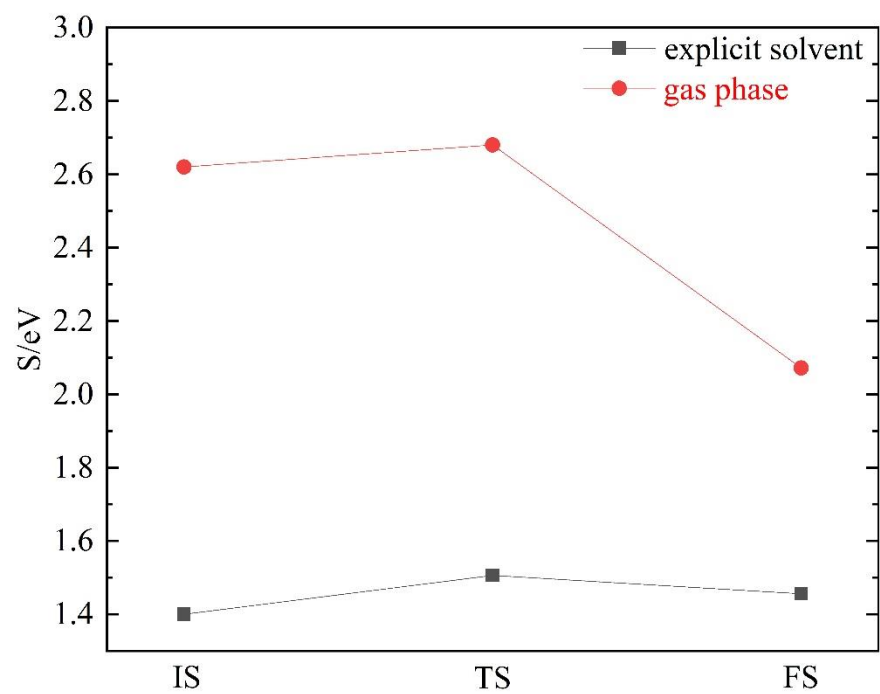

**Fig. S17** The PDOS overlapping areas between C and Ir for IS, TS, and FS of R7 in the gas-phase and explicit models.

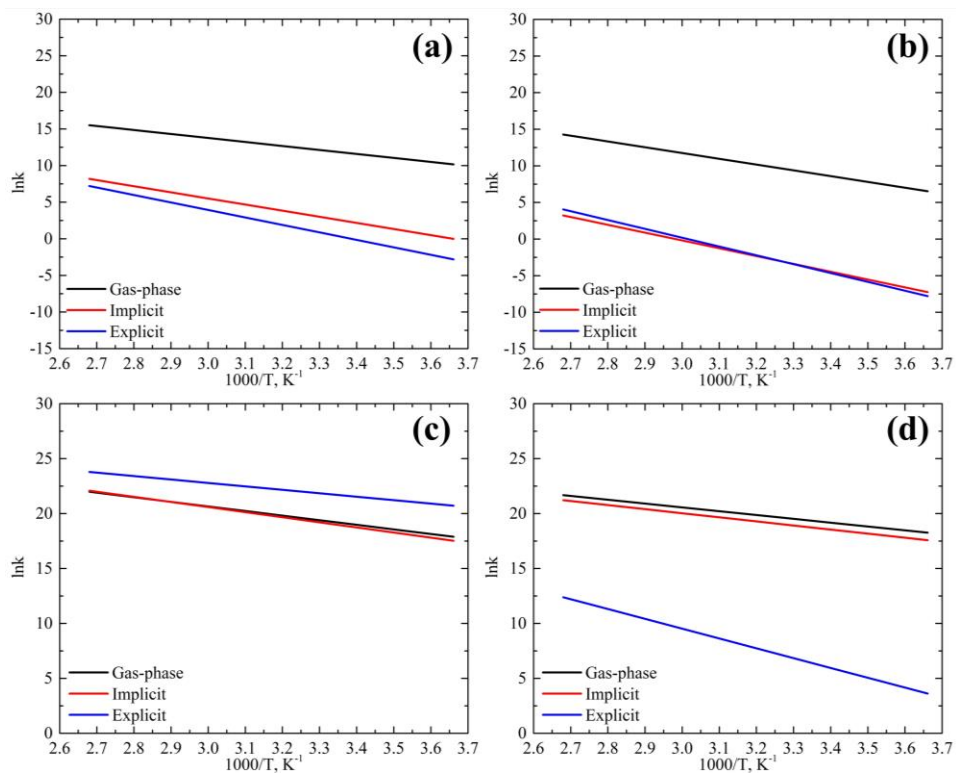

**Fig. S18** Arrhenius plots of the reaction rate constants ( $k$ ) for (a) R1, (b) R4, (c) R6, and (d) R7.



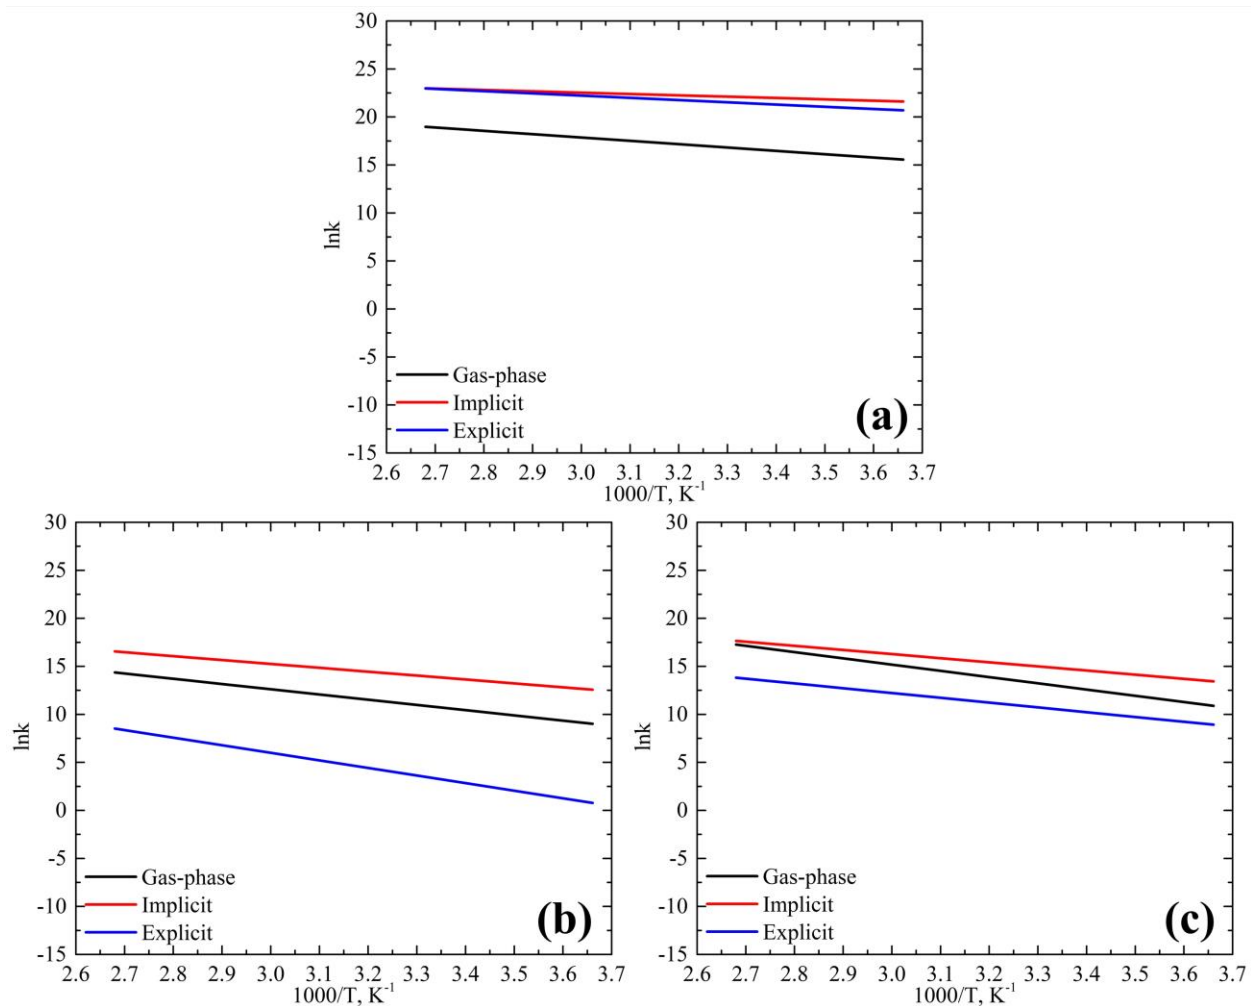

**Fig. S19** Arrhenius plots of the reaction rate constants ( $k$ ) for (a) R3, (b) R2, and (c) R5.

**Table S2.** The reaction rate constant ( $k$ ) at 20 °C of each studied elementary reaction in the gas-phase, implicit, and explicit models over Ir(100)

| Reaction label | $k/s^{-1}$         |                       |                       |
|----------------|--------------------|-----------------------|-----------------------|
|                | Gas-phase          | Implicit              | Explicit              |
| R1             | $1.01 \times 10^5$ | $7.94 \times 10^0$    | $7.70 \times 10^{-1}$ |
| R2             | $3.20 \times 10^4$ | $7.92 \times 10^5$    | $1.56 \times 10^1$    |
| R3             | $1.36 \times 10^7$ | $3.45 \times 10^9$    | $1.73 \times 10^9$    |
| R4             | $4.95 \times 10^3$ | $1.02 \times 10^{-2}$ | $8.44 \times 10^{-3}$ |
| R5             | $2.71 \times 10^5$ | $2.01 \times 10^6$    | $2.60 \times 10^4$    |
| R6             | $1.66 \times 10^8$ | $1.30 \times 10^8$    | $2.16 \times 10^9$    |
| R7             | $2.03 \times 10^8$ | $1.08 \times 10^8$    | $3.45 \times 10^2$    |

## 2. Coordinates of transition states in this work

**Table S3.** The Cartesian coordinates (in Å) of the R1's TS[trans-CH<sub>3</sub>CH<sub>2</sub>O···H]<sup>‡</sup> in the implicit model

| Element | x          | y         | z         |
|---------|------------|-----------|-----------|
| Ir      | 9.3768206  | 9.6062374 | 0.4156915 |
| Ir      | 9.3787937  | 6.8652959 | 0.4236015 |
| Ir      | 6.6365366  | 9.6067858 | 0.4300544 |
| Ir      | 9.3814268  | 4.1252308 | 0.4323442 |
| Ir      | 6.6384006  | 6.8654051 | 0.4362991 |
| Ir      | 9.3813162  | 1.3842887 | 0.4373400 |
| Ir      | 6.6412520  | 4.1259980 | 0.4417113 |
| Ir      | 3.8976779  | 9.6093082 | 0.4442092 |
| Ir      | 6.6419101  | 1.3851660 | 0.4448336 |
| Ir      | 3.8998711  | 6.8679276 | 0.4454581 |
| Ir      | 3.9017353  | 4.1269851 | 0.4469152 |
| Ir      | 3.9025030  | 1.3864820 | 0.4475397 |
| Ir      | 1.1610128  | 1.3874688 | 0.4498294 |
| Ir      | 1.1612321  | 4.1285205 | 0.4508702 |
| Ir      | 1.1598065  | 6.8691339 | 0.4519110 |
| Ir      | 1.1581615  | 9.6096373 | 0.4521192 |
| Ir      | 8.0133677  | 8.2407017 | 2.3642585 |
| Ir      | 8.0157804  | 5.4989915 | 2.3723767 |
| Ir      | 8.0165482  | 2.7582691 | 2.3786216 |
| Ir      | 5.2741804  | 8.2392759 | 2.3792458 |
| Ir      | 8.0172062  | 0.0177656 | 2.3825765 |
| Ir      | 5.2762642  | 5.4987726 | 2.3838253 |
| Ir      | 5.2761545  | 2.7583785 | 2.3854907 |
| Ir      | 5.2760448  | 0.0167786 | 2.3859069 |
| Ir      | 2.5345545  | 0.0162303 | 2.3869479 |
| Ir      | 2.5355413  | 2.7579401 | 2.3884048 |
| Ir      | 10.7589159 | 0.0167786 | 2.3888211 |
| Ir      | 2.5357609  | 8.2396050 | 2.3888211 |
| Ir      | 2.5364187  | 5.4987726 | 2.3892374 |
| Ir      | 10.7601223 | 2.7583785 | 2.3900702 |
| Ir      | 10.7611094 | 5.4994302 | 2.3923597 |
| Ir      | 10.7609997 | 8.2401533 | 2.3946495 |
| Ir      | 6.6475029  | 9.6094179 | 4.3155317 |
| Ir      | 3.8975685  | 1.3930618 | 4.3188620 |
| Ir      | 6.6492572  | 1.3947067 | 4.3207355 |
| Ir      | 3.8997617  | 9.6044836 | 4.3196945 |

|    |            |           |            |
|----|------------|-----------|------------|
| Ir | 9.3932695  | 6.8827319 | 4.3205276  |
| Ir | 9.3839483  | 9.6083212 | 4.3213601  |
| Ir | 9.3950253  | 4.1147027 | 4.3207355  |
| Ir | 1.1572843  | 1.3833017 | 4.3273969  |
| Ir | 9.3828516  | 1.3876883 | 4.3269806  |
| Ir | 1.1577230  | 9.6125984 | 4.3294783  |
| Ir | 1.1637543  | 4.1243534 | 4.3301029  |
| Ir | 1.1672636  | 6.8715467 | 4.3313513  |
| Ir | 6.6515608  | 6.8730812 | 4.3452983  |
| Ir | 3.9171982  | 4.1377325 | 4.3546653  |
| Ir | 6.6418004  | 4.1424479 | 4.3565388  |
| Ir | 3.9276164  | 6.8554258 | 4.3619509  |
| Ir | 5.2739611  | 0.0194105 | 6.1516933  |
| Ir | 8.0120516  | 0.0152433 | 6.1604357  |
| Ir | 5.2700133  | 2.7221894 | 6.1675134  |
| Ir | 5.2731938  | 8.2803993 | 6.1600194  |
| Ir | 2.5378442  | 0.0153530 | 6.1639743  |
| Ir | 10.7523365 | 0.0146950 | 6.1631417  |
| Ir | 2.5278649  | 2.7479608 | 6.1675134  |
| Ir | 10.7607803 | 2.7534437 | 6.1641827  |
| Ir | 2.5002296  | 5.5001984 | 6.1691785  |
| Ir | 10.7612190 | 8.2428942 | 6.1637664  |
| Ir | 10.7440014 | 5.4987726 | 6.1637664  |
| Ir | 2.5322516  | 8.2447596 | 6.1675134  |
| Ir | 8.0218124  | 8.2541904 | 6.1656399  |
| Ir | 8.0227995  | 2.7490573 | 6.1681376  |
| Ir | 8.0197287  | 5.4997597 | 6.1879129  |
| Ir | 5.2343726  | 5.4851742 | 6.2726336  |
| C  | 3.9804742  | 4.6938386 | 9.5686064  |
| C  | 5.4415278  | 4.5945926 | 9.1866369  |
| O  | 5.8159208  | 5.6219254 | 8.2395182  |
| H  | 3.7371297  | 5.6941938 | 9.9507847  |
| H  | 3.7552245  | 3.9527292 | 10.3489914 |
| H  | 3.3317020  | 4.4782391 | 8.7005873  |
| H  | 5.6779633  | 3.5979664 | 8.7551250  |
| H  | 6.0928221  | 4.7534957 | 10.0611086 |
| H  | 7.1411009  | 5.5307941 | 7.6974745  |

**Table S4.** The Cartesian coordinates (in Å) of the R2's TS[trans-CH<sub>3</sub>CHOH···H]<sup>#</sup> in the implicit model

| Element | x         | y         | z         |
|---------|-----------|-----------|-----------|
| Ir      | 1.5098540 | 1.3772701 | 0.6554896 |
| Ir      | 4.2499189 | 4.1201863 | 0.6544487 |
| Ir      | 1.5087574 | 4.1196380 | 0.6546569 |
| Ir      | 4.2510152 | 1.3782572 | 0.6559058 |
| Ir      | 6.9911900 | 1.3782572 | 0.6569467 |
| Ir      | 9.7316933 | 4.1211734 | 0.6521590 |
| Ir      | 6.9911900 | 4.1208444 | 0.6544487 |
| Ir      | 9.7309256 | 1.3788054 | 0.6550732 |
| Ir      | 1.5079896 | 6.8625536 | 0.6550732 |
| Ir      | 4.2503576 | 9.6052504 | 0.6561140 |
| Ir      | 1.5083187 | 9.6048117 | 0.6577792 |
| Ir      | 4.2500281 | 6.8628831 | 0.6538243 |
| Ir      | 6.9921770 | 6.8636503 | 0.6529916 |
| Ir      | 9.7359695 | 9.6057987 | 0.6573630 |
| Ir      | 6.9931636 | 9.6060181 | 0.6556977 |
| Ir      | 9.7343254 | 6.8635406 | 0.6536161 |
| Ir      | 0.1400409 | 0.0053735 | 2.5944812 |
| Ir      | 2.8802154 | 2.7489474 | 2.5934405 |
| Ir      | 0.1382863 | 2.7479608 | 2.5928159 |
| Ir      | 2.8812022 | 0.0073475 | 2.5946894 |
| Ir      | 5.6224737 | 0.0097601 | 2.5967710 |
| Ir      | 8.3622093 | 2.7497151 | 2.5936487 |
| Ir      | 5.6217055 | 2.7500441 | 2.5946894 |
| Ir      | 8.3616610 | 0.0094311 | 2.5976036 |
| Ir      | 0.1378476 | 5.4902182 | 2.5928159 |
| Ir      | 2.8797767 | 8.2324762 | 2.5938568 |
| Ir      | 0.1376283 | 8.2322578 | 2.5951056 |
| Ir      | 2.8797767 | 5.4906573 | 2.5926077 |
| Ir      | 5.6210480 | 5.4915347 | 2.5926077 |
| Ir      | 8.3626480 | 8.2345600 | 2.5928159 |
| Ir      | 5.6212668 | 8.2333536 | 2.5932324 |
| Ir      | 8.3624287 | 5.4925218 | 2.5909426 |
| Ir      | 1.5214784 | 1.3766123 | 4.5307670 |
| Ir      | 4.2544150 | 4.1235862 | 4.5594931 |
| Ir      | 1.5125957 | 4.1202960 | 4.5278525 |
| Ir      | 4.2718515 | 1.4049056 | 4.5728149 |
| Ir      | 6.9968920 | 1.3846177 | 4.5565786 |
| Ir      | 9.7297192 | 4.1185412 | 4.5220246 |

|    |           |            |            |
|----|-----------|------------|------------|
| Ir | 6.9866934 | 4.1188703  | 4.5667782  |
| Ir | 9.7297192 | 1.3709097  | 4.5286851  |
| Ir | 1.5197237 | 6.8688045  | 4.5257711  |
| Ir | 4.2479448 | 9.6100760  | 4.5386772  |
| Ir | 1.5107312 | 9.6066761  | 4.5376363  |
| Ir | 4.2717419 | 6.8373313  | 4.5671945  |
| Ir | 6.9876804 | 6.8448982  | 4.5565786  |
| Ir | 9.7365179 | 9.6050310  | 4.5343056  |
| Ir | 6.9959054 | 9.6042633  | 4.5359712  |
| Ir | 9.7333384 | 6.8729720  | 4.5224409  |
| Ir | 0.1428922 | 0.0116244  | 6.3685937  |
| Ir | 2.8423812 | 2.7524569  | 6.3794184  |
| Ir | 0.1346674 | 2.7479608  | 6.3617249  |
| Ir | 2.8761578 | 0.0039479  | 6.3785858  |
| Ir | 5.6265306 | 10.9543371 | 6.3806672  |
| Ir | 8.4056358 | 2.7526760  | 6.3769202  |
| Ir | 5.6004305 | 2.7129776  | 6.5122228  |
| Ir | 8.3726273 | 10.9643164 | 6.3804588  |
| Ir | 0.1423439 | 5.4939475  | 6.3604755  |
| Ir | 2.8801055 | 8.2359858  | 6.3752551  |
| Ir | 0.1430019 | 8.2314892  | 6.3692183  |
| Ir | 2.8453422 | 5.4996500  | 6.3721328  |
| Ir | 5.6173191 | 5.5442829  | 6.4664278  |
| Ir | 8.3704338 | 8.2359858  | 6.3735900  |
| Ir | 5.6251054 | 8.2561646  | 6.3729653  |
| Ir | 8.4129839 | 5.4960303  | 6.3596430  |
| C  | 4.4056416 | 3.1998861  | 9.3800154  |
| C  | 5.7448583 | 3.5251493  | 8.7680311  |
| O  | 5.8730555 | 4.9360862  | 8.5415554  |
| H  | 4.3783355 | 3.6556494  | 10.3837538 |
| H  | 4.2713032 | 2.1172829  | 9.4805555  |
| H  | 3.5744982 | 3.6197894  | 8.7888470  |
| H  | 6.5466123 | 2.7690160  | 7.9154158  |
| H  | 6.5456252 | 3.2282889  | 9.4659853  |
| H  | 6.6964126 | 5.2851467  | 8.9547491  |



**Table S5.** The Cartesian coordinates (in Å) of the R3's TS[trans-CH<sub>2</sub>CHOH⋯H]<sup>‡</sup> in the implicit model

| Element | x         | y          | z          |
|---------|-----------|------------|------------|
| Ir      | 1.3790249 | 1.3782572  | 20.7943592 |
| Ir      | 4.1177735 | 4.1162381  | 20.8008118 |
| Ir      | 1.3763930 | 4.1170058  | 20.8037262 |
| Ir      | 4.1207342 | 1.3760638  | 20.7943592 |
| Ir      | 6.8620052 | 1.3736513  | 20.7947750 |
| Ir      | 9.6009741 | 4.1152511  | 20.7970657 |
| Ir      | 6.8591542 | 4.1150322  | 20.7972736 |
| Ir      | 9.6041536 | 1.3732126  | 20.7985229 |
| Ir      | 1.3745286 | 6.8547673  | 20.8074741 |
| Ir      | 4.1142645 | 9.5965872  | 20.8076820 |
| Ir      | 1.3734319 | 9.5950518  | 20.8116379 |
| Ir      | 4.1154704 | 6.8554258  | 20.8043518 |
| Ir      | 6.8561931 | 6.8563027  | 20.7997723 |
| Ir      | 9.5975742 | 9.5993290  | 20.8014374 |
| Ir      | 6.8554258 | 9.5979033  | 20.8033104 |
| Ir      | 9.5987797 | 6.8575096  | 20.7976894 |
| Ir      | 0.0080055 | 0.0024126  | 1.9104741  |
| Ir      | 2.7499344 | 2.7431355  | 1.9225472  |
| Ir      | 0.0087731 | 2.7432449  | 1.9240044  |
| Ir      | 2.7500441 | 0.0008773  | 1.9113067  |
| Ir      | 5.4924121 | 10.9661808 | 1.9142209  |
| Ir      | 8.2306128 | 2.7422578  | 1.9194249  |
| Ir      | 5.4906573 | 2.7422578  | 1.9212983  |
| Ir      | 8.2315998 | 0.0003290  | 1.9183841  |
| Ir      | 0.0072378 | 5.4810066  | 1.9319143  |
| Ir      | 2.7462060 | 8.2211819  | 1.9317062  |
| Ir      | 0.0051542 | 8.2200851  | 1.9333715  |
| Ir      | 2.7475219 | 5.4825420  | 1.9300410  |
| Ir      | 5.4876966 | 5.4829807  | 1.9258778  |
| Ir      | 8.2271032 | 8.2253485  | 1.9229636  |
| Ir      | 5.4865999 | 8.2226067  | 1.9279593  |
| Ir      | 8.2287483 | 5.4836388  | 1.9202574  |
| Ir      | 1.3711289 | 1.3765026  | 3.8569593  |
| Ir      | 4.1191993 | 4.1191993  | 3.9079583  |
| Ir      | 1.3838501 | 4.1111937  | 3.8888078  |
| Ir      | 4.1190896 | 1.3790249  | 3.8515475  |
| Ir      | 6.8672690 | 1.3778186  | 3.8552945  |
| Ir      | 9.5986710 | 4.1077943  | 3.8604982  |

|    |            |            |           |
|----|------------|------------|-----------|
| Ir | 6.8408403  | 4.1249018  | 3.8890159 |
| Ir | 9.6020708  | 1.3669618  | 3.8607063 |
| Ir | 1.3960227  | 6.8414984  | 3.9023380 |
| Ir | 4.1168962  | 9.5919819  | 3.8575840 |
| Ir | 1.3740900  | 9.5931873  | 3.8604982 |
| Ir | 4.1209536  | 6.8354673  | 3.9160764 |
| Ir | 6.8423758  | 6.8475294  | 3.8888078 |
| Ir | 9.6056890  | 9.6017408  | 3.8609145 |
| Ir | 6.8636503  | 9.5931873  | 3.8552945 |
| Ir | 9.6039352  | 6.8616767  | 3.8634124 |
| Ir | 0.0065798  | 0.0005483  | 5.6979089 |
| Ir | 2.7419291  | 2.6955411  | 5.7151861 |
| Ir | 10.9588337 | 2.7360070  | 5.7062349 |
| Ir | 2.7471931  | 0.0064702  | 5.6927047 |
| Ir | 5.4899993  | 0.0030706  | 5.6899986 |
| Ir | 8.2335730  | 2.7371037  | 5.7020721 |
| Ir | 5.4972372  | 2.6992698  | 5.7024884 |
| Ir | 8.2285290  | 10.9647551 | 5.6983252 |
| Ir | 10.9419451 | 5.4817743  | 5.7022800 |
| Ir | 2.7480702  | 8.2668018  | 5.7064433 |
| Ir | 0.0000000  | 8.2342310  | 5.7058187 |
| Ir | 2.7136357  | 5.5075450  | 5.8434110 |
| Ir | 5.5460372  | 5.4796910  | 5.8063588 |
| Ir | 8.2346697  | 8.2306128  | 5.7029047 |
| Ir | 5.4953728  | 8.2696524  | 5.7029047 |
| Ir | 8.2561646  | 5.4829807  | 5.6931210 |
| C  | 2.9727716  | 5.3656402  | 8.1231575 |
| C  | 4.2869854  | 4.8215971  | 8.6104555 |
| O  | 5.3877921  | 5.5182924  | 7.9518437 |
| H  | 2.9143207  | 6.4587708  | 8.2082939 |
| H  | 2.1541300  | 4.9529743  | 8.7307711 |
| H  | 2.5771041  | 4.4071770  | 7.1344070 |
| H  | 4.3825026  | 3.7399809  | 8.4197826 |
| H  | 4.3973069  | 5.0143867  | 9.6878815 |
| H  | 6.2319856  | 5.2424874  | 8.3729477 |

**Table S6.** The Cartesian coordinates (in Å) of the R4's TS[gauche-CH<sub>3</sub>CH<sub>2</sub>O···H]<sup>#</sup> in the implicit model

| Element | x          | y         | z         |
|---------|------------|-----------|-----------|
| Ir      | 1.7976123  | 1.3669618 | 0.7937065 |
| Ir      | 4.5363607  | 4.1052718 | 0.7805925 |
| Ir      | 1.7945418  | 4.1063685 | 0.7837149 |
| Ir      | 4.5385542  | 1.3649879 | 0.7943309 |
| Ir      | 7.2785096  | 1.3625753 | 0.7932901 |
| Ir      | 10.0181351 | 4.0998983 | 0.7697682 |
| Ir      | 7.2768641  | 4.1022010 | 0.7762212 |
| Ir      | 10.0190125 | 1.3596143 | 0.7887106 |
| Ir      | 1.7909229  | 6.8463235 | 0.7691438 |
| Ir      | 4.5306587  | 9.5857306 | 0.7433322 |
| Ir      | 1.7889489  | 9.5869370 | 0.7516585 |
| Ir      | 4.5326324  | 6.8444595 | 0.7620664 |
| Ir      | 7.2741227  | 6.8409500 | 0.7537401 |
| Ir      | 10.0127621 | 9.5796986 | 0.7116922 |
| Ir      | 7.2724781  | 9.5816727 | 0.7302183 |
| Ir      | 10.0159426 | 6.8390856 | 0.7427077 |
| Ir      | 0.4277993  | 0.0032899 | 2.7362368 |
| Ir      | 3.1691799  | 2.7463155 | 2.7266617 |
| Ir      | 0.4271413  | 2.7452190 | 2.7279108 |
| Ir      | 3.1693993  | 0.0040576 | 2.7385266 |
| Ir      | 5.9107804  | 0.0042769 | 2.7404001 |
| Ir      | 8.6516123  | 2.7460961 | 2.7218740 |
| Ir      | 5.9102321  | 2.7467544 | 2.7260373 |
| Ir      | 8.6521606  | 0.0037286 | 2.7393594 |
| Ir      | 0.4252770  | 5.4868188 | 2.7181270 |
| Ir      | 3.1656709  | 8.2271032 | 2.6950216 |
| Ir      | 0.4238513  | 8.2278709 | 2.7035561 |
| Ir      | 3.1675351  | 5.4875865 | 2.7133393 |
| Ir      | 5.9088063  | 5.4875865 | 2.7089684 |
| Ir      | 8.6518316  | 8.2253485 | 2.6731648 |
| Ir      | 5.9083676  | 8.2267742 | 2.6854465 |
| Ir      | 8.6504059  | 5.4857225 | 2.7012663 |
| Ir      | 1.7934451  | 1.3650975 | 4.6652370 |
| Ir      | 4.5488625  | 4.1259980 | 4.6848040 |
| Ir      | 1.8029858  | 4.1074653 | 4.6527476 |
| Ir      | 4.5355935  | 1.3693744 | 4.6681514 |
| Ir      | 7.2834444  | 1.3735416 | 4.6658616 |
| Ir      | 10.0133104 | 4.1103168 | 4.6527476 |

|    |            |            |            |
|----|------------|------------|------------|
| Ir | 7.2663364  | 4.1375132  | 4.6908407  |
| Ir | 10.0218639 | 1.3663038  | 4.6664858  |
| Ir | 1.8023279  | 6.8617864  | 4.6435885  |
| Ir | 4.5302200  | 9.5917616  | 4.6579514  |
| Ir | 1.7988186  | 9.5869370  | 4.6583681  |
| Ir | 4.5520430  | 6.8532329  | 4.6768942  |
| Ir | 7.2816896  | 6.8661728  | 4.6644044  |
| Ir | 10.0170383 | 9.5879240  | 4.6514988  |
| Ir | 7.2911210  | 9.5947227  | 4.6508741  |
| Ir | 10.0157232 | 6.8601413  | 4.6383848  |
| Ir | 0.4242900  | 10.9566402 | 6.4982767  |
| Ir | 3.1626003  | 2.7379811  | 6.5020227  |
| Ir | 0.4254963  | 2.7482896  | 6.4980683  |
| Ir | 3.1646838  | 10.9636583 | 6.4984846  |
| Ir | 5.9114380  | 10.9461126 | 6.4978600  |
| Ir | 8.6524897  | 2.7420387  | 6.5016065  |
| Ir | 5.9100122  | 2.7125392  | 6.4995255  |
| Ir | 8.6508446  | 10.9638777 | 6.4978600  |
| Ir | 0.4290056  | 5.4876966  | 6.4812074  |
| Ir | 3.1571169  | 8.2230453  | 6.5005665  |
| Ir | 0.4229741  | 8.2177820  | 6.4916153  |
| Ir | 3.1281657  | 5.4850645  | 6.4905744  |
| Ir | 5.9061742  | 5.4452562  | 6.5825801  |
| Ir | 8.6600571  | 8.2276516  | 6.4976521  |
| Ir | 5.9025555  | 8.2069244  | 6.5347042  |
| Ir | 8.6928463  | 5.4884639  | 6.4878683  |
| C  | 5.5269561  | 5.5630355  | 10.9116430 |
| C  | 5.0997052  | 5.3301091  | 9.4784746  |
| O  | 6.0438023  | 5.9589229  | 8.5684080  |
| H  | 6.5440898  | 5.1831594  | 11.0798340 |
| H  | 4.8426528  | 5.0112062  | 11.5731688 |
| H  | 5.4881353  | 6.6264477  | 11.1805820 |
| H  | 4.0868483  | 5.7274222  | 9.2746878  |
| H  | 5.0930157  | 4.2538667  | 9.2390928  |
| H  | 5.8538647  | 7.2450624  | 8.0448904  |

**Table S7.** The Cartesian coordinates (in Å) of the R5's TS[gauche-CH<sub>3</sub>CHOH···H]<sup>‡</sup> in the implicit model

| Element | x         | y         | z         |
|---------|-----------|-----------|-----------|
| Ir      | 1.4829863 | 1.3720063 | 0.5280969 |
| Ir      | 4.2209673 | 4.1130581 | 0.5216439 |
| Ir      | 1.4792578 | 4.1129484 | 0.5164400 |
| Ir      | 4.2239285 | 1.3711289 | 0.5376721 |
| Ir      | 6.9634452 | 1.3708000 | 0.5412108 |
| Ir      | 9.7026329 | 4.1140451 | 0.5235174 |
| Ir      | 6.9621286 | 4.1132774 | 0.5233092 |
| Ir      | 9.7041674 | 1.3711289 | 0.5401700 |
| Ir      | 1.4766258 | 6.8531227 | 0.5024934 |
| Ir      | 4.2168002 | 9.5951614 | 0.4895876 |
| Ir      | 1.4753097 | 9.5943937 | 0.4852163 |
| Ir      | 4.2184448 | 6.8535614 | 0.5060321 |
| Ir      | 6.9597158 | 6.8546581 | 0.5076973 |
| Ir      | 9.6999998 | 9.5981226 | 0.4902121 |
| Ir      | 6.9584002 | 9.5961485 | 0.4908366 |
| Ir      | 9.7007685 | 6.8563027 | 0.5070729 |
| Ir      | 0.1077997 | 0.0095408 | 2.4662559 |
| Ir      | 2.8484128 | 2.7527859 | 2.4641745 |
| Ir      | 0.1065934 | 2.7513599 | 2.4566805 |
| Ir      | 2.8500576 | 0.0115147 | 2.4785373 |
| Ir      | 5.5912194 | 0.0132693 | 2.4895697 |
| Ir      | 8.3329287 | 2.7539923 | 2.4704192 |
| Ir      | 5.5904512 | 2.7535534 | 2.4691701 |
| Ir      | 8.3321610 | 0.0135983 | 2.4883206 |
| Ir      | 0.1056064 | 5.4921923 | 2.4475217 |
| Ir      | 2.8438067 | 8.2346697 | 2.4348242 |
| Ir      | 0.1028648 | 8.2326965 | 2.4306610 |
| Ir      | 2.8466580 | 5.4938374 | 2.4508522 |
| Ir      | 5.5886970 | 5.4948244 | 2.4531419 |
| Ir      | 8.3291998 | 8.2386179 | 2.4381545 |
| Ir      | 5.5865035 | 8.2363148 | 2.4371140 |
| Ir      | 8.3317223 | 5.4967985 | 2.4537666 |
| Ir      | 1.4825476 | 1.3762832 | 4.3981705 |
| Ir      | 4.2186642 | 4.1301656 | 4.4229412 |
| Ir      | 1.4749808 | 4.1250114 | 4.3900518 |
| Ir      | 4.2352238 | 1.4074279 | 4.4412589 |
| Ir      | 6.9608126 | 1.3890042 | 4.4323082 |
| Ir      | 9.6949558 | 4.1255598 | 4.3954644 |

|    |           |            |            |
|----|-----------|------------|------------|
| Ir | 6.9550004 | 4.1233664  | 4.4306431  |
| Ir | 9.6919947 | 1.3763930  | 4.4037905  |
| Ir | 1.4802446 | 6.8767009  | 4.3736076  |
| Ir | 4.2110977 | 9.6053600  | 4.3987947  |
| Ir | 1.4750904 | 9.6034966  | 4.3940072  |
| Ir | 4.2260118 | 6.8488460  | 4.4114923  |
| Ir | 6.9439244 | 6.8429241  | 4.4198189  |
| Ir | 9.7038383 | 9.6003151  | 4.3965049  |
| Ir | 6.9622383 | 9.5957098  | 4.4006681  |
| Ir | 9.6938591 | 6.8752751  | 4.3804770  |
| Ir | 0.1074707 | 0.0070185  | 6.2328753  |
| Ir | 2.8055341 | 2.7607911  | 6.2364135  |
| Ir | 0.1013295 | 2.7519083  | 6.2301683  |
| Ir | 2.8392007 | 0.0018643  | 6.2414093  |
| Ir | 5.5881486 | 10.9495115 | 6.2468214  |
| Ir | 8.3671436 | 2.7619975  | 6.2576456  |
| Ir | 5.5641322 | 2.7112231  | 6.3804588  |
| Ir | 8.3365479 | 10.9594908 | 6.2470298  |
| Ir | 0.1075804 | 5.5040364  | 6.2208018  |
| Ir | 2.8408461 | 8.2351084  | 6.2368298  |
| Ir | 0.1090060 | 8.2298450  | 6.2299609  |
| Ir | 2.8034506 | 5.5051327  | 6.2253814  |
| Ir | 5.5693960 | 5.5672026  | 6.3223829  |
| Ir | 8.3356705 | 8.2337923  | 6.2380786  |
| Ir | 5.5851874 | 8.2559443  | 6.2355814  |
| Ir | 8.3692274 | 5.5071068  | 6.2314181  |
| C  | 6.1370173 | 3.0170760  | 9.8027849  |
| C  | 5.4709177 | 3.5131960  | 8.5361433  |
| O  | 5.6684222 | 4.9402537  | 8.3773184  |
| H  | 7.2207165 | 3.1939640  | 9.8040333  |
| H  | 5.9411573 | 1.9434655  | 9.9199772  |
| H  | 5.6867366 | 3.5471919  | 10.6558161 |
| H  | 4.3950043 | 3.2867398  | 8.5446777  |
| H  | 6.5434313 | 2.9814351  | 7.7266169  |
| H  | 5.0613227 | 5.4410892  | 8.9741077  |



**Table S8.** The Cartesian coordinates (in Å) of the R6's TS[CH<sub>2</sub>···CO]<sup>#</sup> in the implicit model

| Element | x         | y          | z         |
|---------|-----------|------------|-----------|
| Ir      | 1.3721160 | 1.3671811  | 0.3203552 |
| Ir      | 4.1150322 | 4.1093297  | 0.3166083 |
| Ir      | 1.3727740 | 4.1093297  | 0.3176491 |
| Ir      | 4.1148129 | 1.3675101  | 0.3184817 |
| Ir      | 6.8590450 | 1.3675101  | 0.3199388 |
| Ir      | 9.6010838 | 4.1104259  | 0.3222286 |
| Ir      | 6.8591542 | 4.1097679  | 0.3184817 |
| Ir      | 9.6019611 | 1.3675101  | 0.3247265 |
| Ir      | 1.3734319 | 6.8523550  | 0.3151512 |
| Ir      | 4.1156898 | 9.5952711  | 0.3143186 |
| Ir      | 1.3732126 | 9.5949421  | 0.3151512 |
| Ir      | 4.1156898 | 6.8531227  | 0.3145267 |
| Ir      | 6.8597026 | 6.8538904  | 0.3170246 |
| Ir      | 9.6026182 | 9.5973549  | 0.3226449 |
| Ir      | 6.8599219 | 9.5966969  | 0.3178573 |
| Ir      | 9.6017408 | 6.8538904  | 0.3207715 |
| Ir      | 0.0013160 | 10.9655228 | 2.2618446 |
| Ir      | 2.7428064 | 2.7394068  | 2.2549756 |
| Ir      | 0.0010966 | 2.7401745  | 2.2574735 |
| Ir      | 2.7433548 | 10.9658518 | 2.2593470 |
| Ir      | 5.4859414 | 0.0013160  | 2.2587225 |
| Ir      | 8.2277613 | 2.7402840  | 2.2589307 |
| Ir      | 5.4861612 | 2.7396259  | 2.2545593 |
| Ir      | 8.2280903 | 0.0023029  | 2.2608039 |
| Ir      | 0.0021933 | 5.4821033  | 2.2560163 |
| Ir      | 2.7443419 | 8.2251291  | 2.2512288 |
| Ir      | 0.0020836 | 8.2235937  | 2.2528942 |
| Ir      | 2.7434642 | 5.4826517  | 2.2524776 |
| Ir      | 5.4863801 | 5.4829807  | 2.2522695 |
| Ir      | 8.2283096 | 8.2250195  | 2.2564328 |
| Ir      | 5.4869285 | 8.2258968  | 2.2520614 |
| Ir      | 8.2268839 | 5.4828711  | 2.2570572 |
| Ir      | 1.3680584 | 1.3676198  | 4.1954246 |
| Ir      | 4.1120710 | 4.1058202  | 4.2035427 |
| Ir      | 1.3619173 | 4.1103168  | 4.2010446 |
| Ir      | 4.1061492 | 1.3724449  | 4.1856408 |
| Ir      | 6.8579483 | 1.3767219  | 4.1943836 |
| Ir      | 9.5796986 | 4.1122904  | 4.2183218 |

|    |            |            |           |
|----|------------|------------|-----------|
| Ir | 6.8453364  | 4.1130581  | 4.2351823 |
| Ir | 9.6005354  | 1.3747479  | 4.1927180 |
| Ir | 1.3620269  | 6.8545485  | 4.2000036 |
| Ir | 4.1074653  | 9.5892391  | 4.1854329 |
| Ir | 1.3680584  | 9.5945034  | 4.1950078 |
| Ir | 4.1108646  | 6.8598123  | 4.2022934 |
| Ir | 6.8439112  | 6.8514776  | 4.2333093 |
| Ir | 9.5992184  | 9.5867167  | 4.1925101 |
| Ir | 6.8582768  | 9.5851822  | 4.1945915 |
| Ir | 9.5775061  | 6.8500519  | 4.2185297 |
| Ir | 10.9612465 | 10.9639874 | 6.0376229 |
| Ir | 2.7327173  | 2.7320592  | 6.0334597 |
| Ir | 0.0049349  | 2.7317302  | 6.0374141 |
| Ir | 2.7421484  | 10.9640970 | 6.0301290 |
| Ir | 5.4791427  | 10.9633293 | 6.0243006 |
| Ir | 8.2289667  | 2.7026694  | 6.0426183 |
| Ir | 5.4676280  | 2.7034369  | 6.0320024 |
| Ir | 8.2233744  | 10.9637680 | 6.0234680 |
| Ir | 10.9615746 | 5.4824324  | 6.0397038 |
| Ir | 2.7332656  | 8.2314892  | 6.0336680 |
| Ir | 0.0036189  | 8.2312708  | 6.0367904 |
| Ir | 2.7179127  | 5.4827614  | 6.0263824 |
| Ir | 5.4066544  | 5.4792519  | 6.1335835 |
| Ir | 8.2273226  | 8.2551775  | 6.0436592 |
| Ir | 5.4682856  | 8.2545185  | 6.0342922 |
| Ir | 8.2555056  | 5.4782653  | 6.2530661 |
| C  | 5.9259133  | 5.4197044  | 8.0405188 |
| C  | 7.8319836  | 5.4080801  | 8.1331491 |
| O  | 8.1949711  | 5.3599377  | 9.2657366 |
| H  | 5.7496834  | 6.3213625  | 8.6441774 |
| H  | 5.7568121  | 4.4821868  | 8.5900555 |

**Table S9.** The Cartesian coordinates (in Å) of the R7's TS[CH $\cdots$ CO] $^\ddagger$  in the implicit model

| Element | x         | y         | z         |
|---------|-----------|-----------|-----------|
| Ir      | 1.4018350 | 1.4080857 | 0.3784312 |
| Ir      | 4.1503439 | 4.1519885 | 0.3944594 |
| Ir      | 1.4038090 | 4.1545110 | 0.3803047 |
| Ir      | 4.1564851 | 1.4081954 | 0.3819699 |
| Ir      | 6.8783450 | 1.4094017 | 0.3859249 |
| Ir      | 9.6134758 | 4.1534147 | 0.3873820 |
| Ir      | 6.8772492 | 4.1476021 | 0.3948757 |
| Ir      | 9.6162167 | 1.4056731 | 0.3821781 |
| Ir      | 1.4132400 | 6.8779068 | 0.3782231 |
| Ir      | 4.1479311 | 9.6268539 | 0.3836352 |
| Ir      | 1.4060020 | 9.6198359 | 0.3782231 |
| Ir      | 4.1514406 | 6.8788939 | 0.3919615 |
| Ir      | 6.8827319 | 6.8806486 | 0.3884228 |
| Ir      | 9.6207132 | 9.6249905 | 0.3786394 |
| Ir      | 6.8775778 | 9.6297054 | 0.3842597 |
| Ir      | 9.6222487 | 6.8862414 | 0.3794720 |
| Ir      | 0.0279643 | 0.0326799 | 2.1954424 |
| Ir      | 2.7649584 | 2.7698932 | 2.2025199 |
| Ir      | 0.0318026 | 2.7732928 | 2.1964831 |
| Ir      | 2.7673712 | 0.0404660 | 2.1919038 |
| Ir      | 5.5221305 | 0.0364084 | 2.2287476 |
| Ir      | 8.2456360 | 2.7780085 | 2.2231274 |
| Ir      | 5.5170865 | 2.7764730 | 2.2343678 |
| Ir      | 8.2467327 | 0.0345442 | 2.2127194 |
| Ir      | 0.0266484 | 5.5257502 | 2.2156336 |
| Ir      | 2.7723057 | 8.2519960 | 2.2150092 |
| Ir      | 0.0304866 | 8.2464037 | 2.2145929 |
| Ir      | 2.7753766 | 5.5132484 | 2.2322865 |
| Ir      | 5.5193892 | 5.5179639 | 2.2445676 |
| Ir      | 8.2614279 | 8.2623053 | 2.2114706 |
| Ir      | 5.5207052 | 8.2582483 | 2.2229192 |
| Ir      | 8.2538614 | 5.5197182 | 2.2297885 |
| Ir      | 1.3975581 | 1.4030412 | 4.1904287 |
| Ir      | 4.1308236 | 4.1298366 | 4.1798124 |
| Ir      | 1.4022735 | 4.1411324 | 4.1804371 |
| Ir      | 4.1434350 | 1.4034798 | 4.2033343 |
| Ir      | 6.8839383 | 1.4036993 | 4.2195706 |
| Ir      | 9.6419878 | 4.1308236 | 4.1694045 |

|    |           |           |           |
|----|-----------|-----------|-----------|
| Ir | 6.8859124 | 4.1478214 | 4.2060404 |
| Ir | 9.6223583 | 1.4038090 | 4.1893878 |
| Ir | 1.4035896 | 6.8881054 | 4.1862655 |
| Ir | 4.1301656 | 9.6435232 | 4.1698213 |
| Ir | 1.4047958 | 9.6333246 | 4.1752329 |
| Ir | 4.1382804 | 6.8898597 | 4.1833510 |
| Ir | 6.8854737 | 6.8912864 | 4.2022934 |
| Ir | 9.6405630 | 9.6428652 | 4.1662822 |
| Ir | 6.8856931 | 9.6268539 | 4.2000036 |
| Ir | 9.6249905 | 6.8883252 | 4.1975060 |
| Ir | 0.0299383 | 0.0259904 | 6.0093131 |
| Ir | 2.7692354 | 2.7793243 | 6.0170150 |
| Ir | 0.0288416 | 2.7795436 | 6.0120192 |
| Ir | 2.7703321 | 0.0263194 | 6.0134764 |
| Ir | 5.5033784 | 0.0114051 | 6.0168071 |
| Ir | 8.2651567 | 2.7830532 | 6.0174313 |
| Ir | 5.5046940 | 2.7932518 | 6.0213866 |
| Ir | 8.2651567 | 0.0228101 | 6.0141006 |
| Ir | 0.0428786 | 5.5077648 | 6.0107703 |
| Ir | 2.7610104 | 8.2649374 | 6.0082722 |
| Ir | 0.0427690 | 8.2693233 | 6.0091047 |
| Ir | 2.7610104 | 5.5128088 | 6.0105619 |
| Ir | 5.4838581 | 5.5057907 | 6.1394119 |
| Ir | 8.2731619 | 8.2658148 | 6.0986128 |
| Ir | 5.4818840 | 8.2718458 | 6.1362896 |
| Ir | 8.2732716 | 5.5097389 | 6.0977802 |
| C  | 5.9271202 | 6.8916149 | 7.4943123 |
| C  | 7.7687078 | 6.8854737 | 7.6269093 |
| O  | 8.1482544 | 6.8832803 | 8.7819777 |
| H  | 5.6291628 | 6.8943563 | 8.5527954 |

**Table S10.** The Cartesian coordinates (in Å) of the R1's TS[trans-CH<sub>3</sub>CH<sub>2</sub>O···H]<sup>#</sup> in the explicit model

| Element | x         | y         | z         |
|---------|-----------|-----------|-----------|
| Ir      | 1.5819033 | 1.3708000 | 0.5127700 |
| Ir      | 4.3235035 | 4.1124001 | 0.5127700 |
| Ir      | 1.5819033 | 4.1124001 | 0.5127700 |
| Ir      | 4.3235035 | 1.3708000 | 0.5127700 |
| Ir      | 7.0651031 | 1.3708000 | 0.5127700 |
| Ir      | 9.8067026 | 4.1124001 | 0.5127700 |
| Ir      | 7.0651031 | 4.1124001 | 0.5127700 |
| Ir      | 9.8067026 | 1.3708000 | 0.5127700 |
| Ir      | 1.5819033 | 6.8540001 | 0.5127700 |
| Ir      | 4.3235035 | 9.5956001 | 0.5127700 |
| Ir      | 1.5819033 | 9.5956001 | 0.5127700 |
| Ir      | 4.3235035 | 6.8540001 | 0.5127700 |
| Ir      | 7.0651031 | 6.8540001 | 0.5127700 |
| Ir      | 9.8067026 | 9.5956001 | 0.5127700 |
| Ir      | 7.0651031 | 9.5956001 | 0.5127700 |
| Ir      | 9.8067026 | 6.8540001 | 0.5127700 |
| Ir      | 0.2111032 | 0.0000000 | 2.4512849 |
| Ir      | 2.9527032 | 2.7416000 | 2.4512849 |
| Ir      | 0.2111032 | 2.7416000 | 2.4512849 |
| Ir      | 2.9527032 | 0.0000000 | 2.4512849 |
| Ir      | 5.6943030 | 0.0000000 | 2.4512849 |
| Ir      | 8.4359026 | 2.7416000 | 2.4512849 |
| Ir      | 5.6943030 | 2.7416000 | 2.4512849 |
| Ir      | 8.4359026 | 0.0000000 | 2.4512849 |
| Ir      | 0.2111032 | 5.4832001 | 2.4512849 |
| Ir      | 2.9527032 | 8.2248001 | 2.4512849 |
| Ir      | 0.2111032 | 8.2248001 | 2.4512849 |
| Ir      | 2.9527032 | 5.4832001 | 2.4512849 |
| Ir      | 5.6943030 | 5.4832001 | 2.4512849 |
| Ir      | 8.4359026 | 8.2248001 | 2.4512849 |
| Ir      | 5.6943030 | 8.2248001 | 2.4512849 |
| Ir      | 8.4359026 | 5.4832001 | 2.4512849 |
| Ir      | 1.5868381 | 1.3891139 | 4.3919153 |
| Ir      | 4.2862177 | 4.0882740 | 4.4067202 |
| Ir      | 1.5732398 | 4.1058202 | 4.3902702 |
| Ir      | 4.3216391 | 1.3647685 | 4.4074249 |
| Ir      | 7.0580850 | 1.3713483 | 4.3775802 |
| Ir      | 9.8073616 | 4.1132774 | 4.3613648 |

|    |           |            |            |
|----|-----------|------------|------------|
| Ir | 7.0459118 | 4.1301656  | 4.3771100  |
| Ir | 9.8018780 | 1.3727740  | 4.3634801  |
| Ir | 1.5657827 | 6.8473105  | 4.3695898  |
| Ir | 4.3255868 | 9.6084309  | 4.3764052  |
| Ir | 1.5631506 | 9.5982323  | 4.3608952  |
| Ir | 4.3203230 | 6.8498330  | 4.3677096  |
| Ir | 7.0717931 | 6.8715467  | 4.3679452  |
| Ir | 9.7965050 | 9.5834274  | 4.3674750  |
| Ir | 7.0521626 | 9.6195068  | 4.3855700  |
| Ir | 9.8025360 | 6.8590450  | 4.3778148  |
| Ir | 0.2026591 | 10.9639874 | 6.2023549  |
| Ir | 2.9498520 | 2.7036562  | 6.3078704  |
| Ir | 0.1662506 | 2.7428064  | 6.2002397  |
| Ir | 2.9146500 | 10.9271412 | 6.1936598  |
| Ir | 5.6916714 | 0.0081151  | 6.3010550  |
| Ir | 8.4293232 | 2.7406130  | 6.2035298  |
| Ir | 5.7123981 | 2.7494957  | 6.1934252  |
| Ir | 8.4648542 | 0.0038382  | 6.1929545  |
| Ir | 0.1742561 | 5.4896708  | 6.2117548  |
| Ir | 2.9484265 | 8.2314892  | 6.1974201  |
| Ir | 0.2097873 | 8.2228260  | 6.2108150  |
| Ir | 2.8975422 | 5.5200467  | 6.2089348  |
| Ir | 5.6503282 | 5.4776073  | 6.1950698  |
| Ir | 8.4196730 | 8.2365341  | 6.2119904  |
| Ir | 5.6790600 | 8.2392759  | 6.1807351  |
| Ir | 8.3931341 | 5.4817743  | 6.2425399  |
| O  | 7.9806881 | 1.1687989  | 9.3426600  |
| O  | 5.4169631 | 0.4159556  | 11.6926603 |
| O  | 4.6136742 | 8.9490213  | 9.2787399  |
| O  | 5.1546469 | 4.4654083  | 12.3034248 |
| O  | 2.6992698 | 3.0421891  | 11.9246054 |
| O  | 7.0894489 | 2.6688929  | 11.6278000 |
| O  | 2.7818468 | 2.7207639  | 8.4113550  |
| O  | 9.8828096 | 6.5393744  | 12.0341158 |
| O  | 0.8534053 | 3.7351561  | 10.0377903 |
| O  | 4.6893425 | 7.2516418  | 11.5267496 |
| O  | 9.8054972 | 10.2005062 | 10.2114544 |
| O  | 8.0644712 | 8.1731482  | 9.6620255  |
| O  | 9.5358334 | 3.8949366  | 11.5239296 |
| O  | 5.7189775 | 0.1392733  | 8.4061852  |
| O  | 0.5447011 | 6.4119444  | 9.7022104  |

|   |            |            |            |
|---|------------|------------|------------|
| O | 3.2809277  | 1.0448786  | 10.3023996 |
| O | 6.7977424  | 8.9560394  | 11.8978157 |
| O | 8.3383026  | 5.5409932  | 9.6815300  |
| O | 1.5101830  | 10.1337214 | 9.4883595  |
| O | 5.9600191  | 5.8811708  | 8.1916304  |
| O | 2.0330608  | 8.0928745  | 11.1965752 |
| O | 10.7537622 | 9.1923656  | 12.5356045 |
| H | 8.6858273  | 0.5364763  | 9.6674299  |
| H | 8.3293104  | 1.5318964  | 8.4860849  |
| H | 5.9458728  | 10.5509930 | 11.7669201 |
| H | 6.0521369  | 1.1705536  | 11.7941799 |
| H | 4.4132085  | 8.4908447  | 8.4242802  |
| H | 4.7812409  | 8.2512293  | 9.9665852  |
| H | 5.0089035  | 5.4192662  | 12.0919247 |
| H | 4.2775540  | 4.0258751  | 12.1986151 |
| H | 2.8975422  | 2.1872485  | 11.4141846 |
| H | 2.3696196  | 2.7754862  | 12.8002157 |
| H | 6.4086542  | 3.3982680  | 11.7361355 |
| H | 7.2112856  | 2.4611890  | 10.6734648 |
| H | 1.9065087  | 3.0205853  | 8.7878246  |
| H | 3.1190636  | 1.9621084  | 9.0054350  |
| H | 10.3005199 | 6.5963993  | 11.1408796 |
| H | 10.1566410 | 7.3640471  | 12.4897804 |
| H | 10.9146395 | 3.5821745  | 10.4217806 |
| H | 1.4651110  | 3.5741689  | 10.8116455 |
| H | 3.7710161  | 7.5942321  | 11.6726847 |
| H | 5.3392110  | 7.8751912  | 11.9391756 |
| H | 9.3083906  | 9.4011660  | 9.8730555  |
| H | 10.6972847 | 10.2119122 | 9.7626057  |
| H | 7.6355753  | 8.2983847  | 8.7828894  |
| H | 8.2336836  | 7.1719155  | 9.7247696  |
| H | 9.6298151  | 4.7147846  | 12.0717144 |
| H | 8.6823177  | 3.4344573  | 11.7619848 |
| H | 6.6073656  | 0.4396430  | 8.7908802  |
| H | 5.3906436  | 10.2448111 | 8.8444595  |
| H | 0.7163253  | 5.4243107  | 9.7275906  |
| H | 0.3852496  | 6.6371942  | 8.7551603  |
| H | 4.1446414  | 0.6843033  | 10.6925001 |
| H | 2.6676865  | 0.2860037  | 10.0699854 |
| H | 7.2512031  | 8.6546831  | 11.0480547 |
| H | 7.4548492  | 8.8259783  | 12.6037550 |

|   |            |           |            |
|---|------------|-----------|------------|
| H | 8.5810986  | 5.2754965 | 8.7626801  |
| H | 8.8212624  | 4.9279714 | 10.2974653 |
| H | 1.8229446  | 9.3230848 | 9.9947844  |
| H | 1.7040689  | 9.9745989 | 8.5314398  |
| H | 3.6945801  | 6.5194149 | 9.3678045  |
| H | 3.2882750  | 4.9045033 | 10.0013657 |
| H | 3.2341013  | 5.1953321 | 8.2578993  |
| H | 5.3184848  | 3.9666567 | 8.7549248  |
| H | 5.7519870  | 5.1131935 | 10.0650501 |
| H | 7.1589756  | 5.5911098 | 7.6652303  |
| H | 1.3553374  | 8.4305296 | 11.8338957 |
| H | 1.5598608  | 7.3866377 | 10.6643000 |
| H | 10.7941179 | 9.8318167 | 13.2664557 |
| H | 10.3485537 | 9.6694040 | 11.7441244 |
| C | 3.8019412  | 5.4460239 | 9.1981344  |
| C | 5.2446809  | 5.0180054 | 9.0970850  |



**Table S11.** The Cartesian coordinates (in Å) of the R2's TS[trans-CH<sub>3</sub>CHOH···H]<sup>‡</sup> in the explicit model

| Element | x         | y         | z         |
|---------|-----------|-----------|-----------|
| Ir      | 1.5819033 | 1.3708000 | 0.5127700 |
| Ir      | 4.3235035 | 4.1124001 | 0.5127700 |
| Ir      | 1.5819033 | 4.1124001 | 0.5127700 |
| Ir      | 4.3235035 | 1.3708000 | 0.5127700 |
| Ir      | 7.0651031 | 1.3708000 | 0.5127700 |
| Ir      | 9.8067026 | 4.1124001 | 0.5127700 |
| Ir      | 7.0651031 | 4.1124001 | 0.5127700 |
| Ir      | 9.8067026 | 1.3708000 | 0.5127700 |
| Ir      | 1.5819033 | 6.8540001 | 0.5127700 |
| Ir      | 4.3235035 | 9.5956001 | 0.5127700 |
| Ir      | 1.5819033 | 9.5956001 | 0.5127700 |
| Ir      | 4.3235035 | 6.8540001 | 0.5127700 |
| Ir      | 7.0651031 | 6.8540001 | 0.5127700 |
| Ir      | 9.8067026 | 9.5956001 | 0.5127700 |
| Ir      | 7.0651031 | 9.5956001 | 0.5127700 |
| Ir      | 9.8067026 | 6.8540001 | 0.5127700 |
| Ir      | 0.2111032 | 0.0000000 | 2.4512849 |
| Ir      | 2.9527032 | 2.7416000 | 2.4512849 |
| Ir      | 0.2111032 | 2.7416000 | 2.4512849 |
| Ir      | 2.9527032 | 0.0000000 | 2.4512849 |
| Ir      | 5.6943030 | 0.0000000 | 2.4512849 |
| Ir      | 8.4359026 | 2.7416000 | 2.4512849 |
| Ir      | 5.6943030 | 2.7416000 | 2.4512849 |
| Ir      | 8.4359026 | 0.0000000 | 2.4512849 |
| Ir      | 0.2111032 | 5.4832001 | 2.4512849 |
| Ir      | 2.9527032 | 8.2248001 | 2.4512849 |
| Ir      | 0.2111032 | 8.2248001 | 2.4512849 |
| Ir      | 2.9527032 | 5.4832001 | 2.4512849 |
| Ir      | 5.6943030 | 5.4832001 | 2.4512849 |
| Ir      | 8.4359026 | 8.2248001 | 2.4512849 |
| Ir      | 5.6943030 | 8.2248001 | 2.4512849 |
| Ir      | 8.4359026 | 5.4832001 | 2.4512849 |
| Ir      | 1.5948435 | 1.3724449 | 4.3808699 |
| Ir      | 4.2863269 | 4.0922217 | 4.4241099 |
| Ir      | 1.5776263 | 4.1057105 | 4.3827500 |
| Ir      | 4.3412690 | 1.3785862 | 4.4473753 |
| Ir      | 7.0594006 | 1.3681681 | 4.4046049 |
| Ir      | 9.8080196 | 4.1142645 | 4.3402147 |

|    |           |            |            |
|----|-----------|------------|------------|
| Ir | 7.0466800 | 4.1102066  | 4.3855700  |
| Ir | 9.7980394 | 1.3513895  | 4.3437400  |
| Ir | 1.5800389 | 6.8497233  | 4.3590150  |
| Ir | 4.3297544 | 9.6042633  | 4.3808699  |
| Ir | 1.5787230 | 9.5960388  | 4.3615999  |
| Ir | 4.3364434 | 6.8234043  | 4.3858051  |
| Ir | 7.0625811 | 6.8465428  | 4.3740549  |
| Ir | 9.7984781 | 9.5834274  | 4.3557248  |
| Ir | 7.0530400 | 9.6146812  | 4.3912101  |
| Ir | 9.8125153 | 6.8682561  | 4.3484402  |
| Ir | 0.2086906 | 10.9569693 | 6.1875501  |
| Ir | 2.9235327 | 2.7429161  | 6.3008199  |
| Ir | 0.1420149 | 2.7389681  | 6.1753302  |
| Ir | 2.9169526 | 10.9195738 | 6.1981249  |
| Ir | 5.6961679 | 10.9464407 | 6.3109250  |
| Ir | 8.4752731 | 2.7422578  | 6.2047052  |
| Ir | 5.6798272 | 2.7527859  | 6.3003497  |
| Ir | 8.4761505 | 10.9569693 | 6.2032948  |
| Ir | 0.2025494 | 5.4924121  | 6.2004752  |
| Ir | 2.9466717 | 8.2183294  | 6.1995354  |
| Ir | 0.2121998 | 8.2210712  | 6.2025900  |
| Ir | 2.9115794 | 5.5073261  | 6.2155151  |
| Ir | 5.6798272 | 5.5408831  | 6.2690949  |
| Ir | 8.4281178 | 8.2265549  | 6.1988301  |
| Ir | 5.6978126 | 8.2136145  | 6.1875501  |
| Ir | 8.4873362 | 5.4850645  | 6.1567655  |
| O  | 8.0062399 | 1.0143920  | 9.4075203  |
| O  | 5.2452292 | 0.2630839  | 11.6842003 |
| O  | 4.5443664 | 8.7364922  | 9.2056551  |
| O  | 5.1807470 | 4.2931261  | 12.3776846 |
| O  | 2.5966244 | 2.9233134  | 12.0305901 |
| O  | 7.1903396 | 2.5111959  | 11.7756147 |
| O  | 2.1154187 | 2.3843148  | 8.2933855  |
| O  | 9.7144756 | 6.6559467  | 11.7619848 |
| O  | 0.8642620 | 3.8511803  | 10.1397800 |
| O  | 4.6822143 | 6.8839383  | 11.3232403 |
| O  | 9.8459635 | 10.1115694 | 10.3082752 |
| O  | 7.9886937 | 8.3291998  | 9.5099802  |
| O  | 9.2959976 | 4.1110840  | 11.1573296 |
| O  | 5.6991282 | 10.9412870 | 8.4447250  |
| O  | 0.5589574 | 6.4539456  | 9.6112652  |

|   |            |            |            |
|---|------------|------------|------------|
| O | 2.9760618  | 0.8952969  | 10.3674955 |
| O | 6.6221704  | 8.7917633  | 11.7688007 |
| O | 8.3520107  | 5.6684222  | 9.2404346  |
| O | 1.4483325  | 9.8816042  | 9.4422998  |
| O | 6.0639806  | 5.0551815  | 8.3333349  |
| O | 2.1218886  | 7.9139028  | 11.2090302 |
| O | 10.8628769 | 9.0516663  | 12.5701504 |
| H | 8.7236624  | 0.4117883  | 9.7651901  |
| H | 8.3620996  | 1.3260571  | 8.5319099  |
| H | 5.7391558  | 10.3741055 | 11.7363701 |
| H | 5.8965235  | 0.9643852  | 11.9058046 |
| H | 4.2747030  | 8.3603449  | 8.3255796  |
| H | 4.6994314  | 7.9635806  | 9.8096056  |
| H | 5.0273266  | 5.2100272  | 12.0254202 |
| H | 4.2956486  | 3.8614891  | 12.3635845 |
| H | 2.7021210  | 2.0656312  | 11.5009003 |
| H | 2.2331977  | 2.6656029  | 12.8956242 |
| H | 6.4435277  | 3.1760890  | 11.8618603 |
| H | 7.2338762  | 2.1540203  | 10.8586445 |
| H | 1.5894700  | 3.0458081  | 8.8350601  |
| H | 2.6021073  | 1.7926774  | 8.9410448  |
| H | 10.2483206 | 6.7009091  | 10.9293795 |
| H | 10.0864563 | 7.3690920  | 12.3297453 |
| H | 10.8967638 | 3.7217767  | 10.4614944 |
| H | 1.4551317  | 3.6246147  | 10.9145746 |
| H | 3.7675068  | 7.2366176  | 11.4922047 |
| H | 5.3192525  | 7.5376458  | 11.7107553 |
| H | 9.2797680  | 9.3738594  | 9.9350948  |
| H | 10.7189980 | 10.0727482 | 9.8194752  |
| H | 7.6978645  | 8.5167255  | 8.5760899  |
| H | 8.2060480  | 7.3525324  | 9.5055151  |
| H | 9.4183826  | 4.9163466  | 11.7333145 |
| H | 8.5830727  | 3.5207627  | 11.5464907 |
| H | 6.5904770  | 0.2248112  | 8.8376446  |
| H | 5.3601570  | 10.0582724 | 8.8235455  |
| H | 0.7669900  | 5.4759622  | 9.6911650  |
| H | 0.5592864  | 6.6652684  | 8.6433001  |
| H | 3.8545799  | 0.5473331  | 10.7026052 |
| H | 2.4103050  | 0.1127346  | 10.0890198 |
| H | 7.0964670  | 8.6305571  | 10.8957748 |
| H | 7.2932048  | 8.6385622  | 12.4571142 |

|   |            |           |            |
|---|------------|-----------|------------|
| H | 8.9325724  | 5.5758657 | 8.4278049  |
| H | 8.6910915  | 5.0090127 | 9.9386196  |
| H | 1.8414779  | 9.1106663 | 9.9470797  |
| H | 1.6354193  | 9.7403564 | 8.4795055  |
| H | 4.8889308  | 3.6149642 | 10.3068647 |
| H | 4.7571149  | 2.1331842 | 9.3083506  |
| H | 3.9509747  | 3.6483018 | 8.7939348  |
| H | 6.7694492  | 2.9851637 | 7.6151752  |
| H | 6.9648705  | 3.4237103 | 9.1591253  |
| H | 6.9820876  | 5.4053388 | 8.6682100  |
| H | 1.4801350  | 8.2683373 | 11.8712597 |
| H | 1.5923213  | 7.2788382 | 10.6389198 |
| H | 10.8538847 | 9.6407814 | 13.3428307 |
| H | 10.4367228 | 9.5512962 | 11.8024044 |
| C | 4.8332214  | 3.2242315 | 9.2801495  |
| C | 6.0657353  | 3.6529078 | 8.5558805  |

**Table S12.** The Cartesian coordinates (in Å) of the R3's TS[trans-CH<sub>2</sub>CH<sub>2</sub>OH···H]<sup>‡</sup> in the explicit model

| Element | x         | y         | z         |
|---------|-----------|-----------|-----------|
| Ir      | 1.5819033 | 1.3708000 | 0.5127700 |
| Ir      | 4.3235035 | 4.1124001 | 0.5127700 |
| Ir      | 1.5819033 | 4.1124001 | 0.5127700 |
| Ir      | 4.3235035 | 1.3708000 | 0.5127700 |
| Ir      | 7.0651031 | 1.3708000 | 0.5127700 |
| Ir      | 9.8067026 | 4.1124001 | 0.5127700 |
| Ir      | 7.0651031 | 4.1124001 | 0.5127700 |
| Ir      | 9.8067026 | 1.3708000 | 0.5127700 |
| Ir      | 1.5819033 | 6.8540001 | 0.5127700 |
| Ir      | 4.3235035 | 9.5956001 | 0.5127700 |
| Ir      | 1.5819033 | 9.5956001 | 0.5127700 |
| Ir      | 4.3235035 | 6.8540001 | 0.5127700 |
| Ir      | 7.0651031 | 6.8540001 | 0.5127700 |
| Ir      | 9.8067026 | 9.5956001 | 0.5127700 |
| Ir      | 7.0651031 | 9.5956001 | 0.5127700 |
| Ir      | 9.8067026 | 6.8540001 | 0.5127700 |
| Ir      | 0.2111032 | 0.0000000 | 2.4512849 |
| Ir      | 2.9527032 | 2.7416000 | 2.4512849 |
| Ir      | 0.2111032 | 2.7416000 | 2.4512849 |
| Ir      | 2.9527032 | 0.0000000 | 2.4512849 |
| Ir      | 5.6943030 | 0.0000000 | 2.4512849 |
| Ir      | 8.4359026 | 2.7416000 | 2.4512849 |
| Ir      | 5.6943030 | 2.7416000 | 2.4512849 |
| Ir      | 8.4359026 | 0.0000000 | 2.4512849 |
| Ir      | 0.2111032 | 5.4832001 | 2.4512849 |
| Ir      | 2.9527032 | 8.2248001 | 2.4512849 |
| Ir      | 0.2111032 | 8.2248001 | 2.4512849 |
| Ir      | 2.9527032 | 5.4832001 | 2.4512849 |
| Ir      | 5.6943030 | 5.4832001 | 2.4512849 |
| Ir      | 8.4359026 | 8.2248001 | 2.4512849 |
| Ir      | 5.6943030 | 8.2248001 | 2.4512849 |
| Ir      | 8.4359026 | 5.4832001 | 2.4512849 |
| Ir      | 1.5913343 | 1.3913072 | 4.3818102 |
| Ir      | 4.2981710 | 4.1012139 | 4.4288101 |
| Ir      | 1.5923213 | 4.1090002 | 4.4154148 |
| Ir      | 4.3316183 | 1.3718966 | 4.4050751 |
| Ir      | 7.0665288 | 1.3705807 | 4.3745251 |
| Ir      | 9.8238106 | 4.1142645 | 4.3529053 |

|    |           |            |            |
|----|-----------|------------|------------|
| Ir | 7.0449247 | 4.1225991  | 4.3731151  |
| Ir | 9.8119669 | 1.3619173  | 4.3564301  |
| Ir | 1.5973659 | 6.8340411  | 4.3975549  |
| Ir | 4.3379788 | 9.6006451  | 4.3733501  |
| Ir | 1.5776263 | 9.5861692  | 4.3585448  |
| Ir | 4.3334827 | 6.8404016  | 4.3886247  |
| Ir | 7.0655417 | 6.8633218  | 4.3641849  |
| Ir | 9.8071413 | 9.5906649  | 4.3620701  |
| Ir | 7.0625811 | 9.6135855  | 4.3811049  |
| Ir | 9.8334618 | 6.8614573  | 4.3641849  |
| Ir | 0.2189990 | 10.9610262 | 6.1955395  |
| Ir | 2.9686046 | 2.6693316  | 6.3104553  |
| Ir | 0.1658120 | 2.7327173  | 6.2009449  |
| Ir | 2.9236424 | 10.9285660 | 6.1835551  |
| Ir | 5.6956196 | 0.0048252  | 6.2951798  |
| Ir | 8.4410582 | 2.7421484  | 6.1936598  |
| Ir | 5.7319179 | 2.7431355  | 6.1953049  |
| Ir | 8.4713249 | 10.9653034 | 6.1934252  |
| Ir | 0.1912540 | 5.4876966  | 6.2185702  |
| Ir | 2.9653144 | 8.2471724  | 6.1995354  |
| Ir | 0.2134061 | 8.2284184  | 6.2159853  |
| Ir | 2.9757326 | 5.5174155  | 6.3492298  |
| Ir | 5.7569213 | 5.4938374  | 6.2399549  |
| Ir | 8.4326134 | 8.2271032  | 6.1960101  |
| Ir | 5.7054887 | 8.2382889  | 6.1856704  |
| Ir | 8.4718733 | 5.4818840  | 6.1555901  |
| O  | 7.9659934 | 1.2065233  | 9.3356104  |
| O  | 5.3917403 | 0.3459899  | 11.7467098 |
| O  | 4.5241885 | 8.9520922  | 9.2246904  |
| O  | 5.0759077 | 4.4107957  | 12.2087193 |
| O  | 2.6034234 | 3.0288103  | 11.9269543 |
| O  | 7.0320945 | 2.6356645  | 11.5730448 |
| O  | 2.6740470 | 2.6329229  | 8.4369698  |
| O  | 9.5404396 | 6.7504773  | 11.8806591 |
| O  | 0.7192862 | 3.7667391  | 10.0751553 |
| O  | 4.6018305 | 7.1037049  | 11.3624849 |
| O  | 9.8216171 | 10.2621374 | 10.2015848 |
| O  | 8.0242252 | 8.3252525  | 9.4665051  |
| O  | 9.2299805 | 4.1400352  | 11.2463951 |
| O  | 5.7057085 | 0.1412472  | 8.4134703  |
| O  | 0.3116651 | 6.4469275  | 9.6871700  |

|   |            |            |            |
|---|------------|------------|------------|
| O | 3.2502217  | 1.0138437  | 10.3681993 |
| O | 6.7037601  | 8.8319006  | 11.7523508 |
| O | 8.1116266  | 5.5712605  | 9.2902555  |
| O | 1.5021775  | 10.1456747 | 9.4643898  |
| O | 5.7154679  | 5.6473670  | 8.3424997  |
| O | 1.9799834  | 8.0358496  | 11.1303053 |
| O | 10.7759142 | 9.2040997  | 12.4996500 |
| H | 8.6952591  | 0.5982171  | 9.6502752  |
| H | 8.2816057  | 1.5722529  | 8.4642296  |
| H | 5.9086962  | 10.4712677 | 11.7800798 |
| H | 6.0374417  | 1.0902796  | 11.8350706 |
| H | 4.3373208  | 8.5944777  | 8.3138304  |
| H | 4.7017345  | 8.1778641  | 9.8166552  |
| H | 4.9292874  | 5.3720007  | 12.0200148 |
| H | 4.1865330  | 3.9836545  | 12.1565504 |
| H | 2.8239577  | 2.1722245  | 11.4233494 |
| H | 2.3179681  | 2.7596946  | 12.8171349 |
| H | 6.3082023  | 3.3259995  | 11.6503601 |
| H | 7.1531630  | 2.3514156  | 10.6346903 |
| H | 1.7681127  | 2.8632176  | 8.7687902  |
| H | 3.0465758  | 1.9045347  | 9.0413895  |
| H | 10.0446739 | 6.7512445  | 11.0285501 |
| H | 9.9527760  | 7.4799619  | 12.3957806 |
| H | 10.7671404 | 3.6652999  | 10.4443398 |
| H | 1.3300051  | 3.5806394  | 10.8426647 |
| H | 3.6921675  | 7.4727249  | 11.5086546 |
| H | 5.2673812  | 7.7409625  | 11.7319050 |
| H | 9.3106928  | 9.4910898  | 9.8258200  |
| H | 10.7134056 | 10.2692661 | 9.7494450  |
| H | 7.7137661  | 8.5184803  | 8.5391951  |
| H | 8.1670074  | 7.3358636  | 9.4707356  |
| H | 9.3197956  | 4.9361959  | 11.8327198 |
| H | 8.4719820  | 3.5660539  | 11.5702257 |
| H | 6.5948639  | 0.4326245  | 8.7936993  |
| H | 5.3740845  | 10.2481003 | 8.8423452  |
| H | 0.4972166  | 5.4637895  | 9.7445097  |
| H | 0.2067166  | 6.6511221  | 8.7231998  |
| H | 4.1122904  | 0.6485529  | 10.7547750 |
| H | 2.6453149  | 0.2556268  | 10.1089954 |
| H | 7.1451578  | 8.6593981  | 10.8645201 |
| H | 7.3668985  | 8.5542307  | 12.4098797 |

|   |            |            |            |
|---|------------|------------|------------|
| H | 8.6197004  | 5.4067645  | 8.4421396  |
| H | 8.5184803  | 4.9673409  | 9.9947844  |
| H | 1.8102237  | 9.3112412  | 9.9259300  |
| H | 1.6882774  | 10.0312958 | 8.4968948  |
| H | 3.3409140  | 6.5973864  | 8.7685547  |
| H | 2.6035330  | 5.1115489  | 9.3379602  |
| H | 2.2747605  | 5.0548525  | 7.7735653  |
| H | 4.7173066  | 3.8329761  | 8.6082850  |
| H | 4.8184166  | 4.9202948  | 10.0340300 |
| H | 6.6317115  | 5.4789233  | 8.7737246  |
| H | 1.3451387  | 8.4179182  | 11.7873650 |
| H | 1.4385724  | 7.3745747  | 10.6100149 |
| H | 10.8008080 | 9.8208504  | 13.2504749 |
| H | 10.3668671 | 9.6984644  | 11.7196856 |
| C | 3.3290701  | 5.5150027  | 8.6136904  |
| C | 4.6546888  | 4.8797193  | 8.9478607  |



**Table S13.** The Cartesian coordinates (in Å) of the R4's TS[gauche-CH<sub>3</sub>CH<sub>2</sub>O···H]<sup>#</sup> in the explicit model

| Element | x         | y         | z         |
|---------|-----------|-----------|-----------|
| Ir      | 1.5819033 | 1.3708000 | 0.5127700 |
| Ir      | 4.3235035 | 4.1124001 | 0.5127700 |
| Ir      | 1.5819033 | 4.1124001 | 0.5127700 |
| Ir      | 4.3235035 | 1.3708000 | 0.5127700 |
| Ir      | 7.0651031 | 1.3708000 | 0.5127700 |
| Ir      | 9.8067026 | 4.1124001 | 0.5127700 |
| Ir      | 7.0651031 | 4.1124001 | 0.5127700 |
| Ir      | 9.8067026 | 1.3708000 | 0.5127700 |
| Ir      | 1.5819033 | 6.8540001 | 0.5127700 |
| Ir      | 4.3235035 | 9.5956001 | 0.5127700 |
| Ir      | 1.5819033 | 9.5956001 | 0.5127700 |
| Ir      | 4.3235035 | 6.8540001 | 0.5127700 |
| Ir      | 7.0651031 | 6.8540001 | 0.5127700 |
| Ir      | 9.8067026 | 9.5956001 | 0.5127700 |
| Ir      | 7.0651031 | 9.5956001 | 0.5127700 |
| Ir      | 9.8067026 | 6.8540001 | 0.5127700 |
| Ir      | 0.2111032 | 0.0000000 | 2.4512849 |
| Ir      | 2.9527032 | 2.7416000 | 2.4512849 |
| Ir      | 0.2111032 | 2.7416000 | 2.4512849 |
| Ir      | 2.9527032 | 0.0000000 | 2.4512849 |
| Ir      | 5.6943030 | 0.0000000 | 2.4512849 |
| Ir      | 8.4359026 | 2.7416000 | 2.4512849 |
| Ir      | 5.6943030 | 2.7416000 | 2.4512849 |
| Ir      | 8.4359026 | 0.0000000 | 2.4512849 |
| Ir      | 0.2111032 | 5.4832001 | 2.4512849 |
| Ir      | 2.9527032 | 8.2248001 | 2.4512849 |
| Ir      | 0.2111032 | 8.2248001 | 2.4512849 |
| Ir      | 2.9527032 | 5.4832001 | 2.4512849 |
| Ir      | 5.6943030 | 5.4832001 | 2.4512849 |
| Ir      | 8.4359026 | 8.2248001 | 2.4512849 |
| Ir      | 5.6943030 | 8.2248001 | 2.4512849 |
| Ir      | 8.4359026 | 5.4832001 | 2.4512849 |
| Ir      | 1.5894700 | 1.3963518 | 4.3977900 |
| Ir      | 4.2938938 | 4.0984726 | 4.4020200 |
| Ir      | 1.5732398 | 4.1098776 | 4.3916802 |
| Ir      | 4.3148398 | 1.3714581 | 4.4111853 |
| Ir      | 7.0516143 | 1.3645492 | 4.3747602 |
| Ir      | 9.8046198 | 4.1211734 | 4.3681803 |

|    |           |            |            |
|----|-----------|------------|------------|
| Ir | 7.0524921 | 4.1084518  | 4.3634801  |
| Ir | 9.8083487 | 1.3716774  | 4.3594847  |
| Ir | 1.5668792 | 6.8498330  | 4.3583102  |
| Ir | 4.3215294 | 9.6075535  | 4.3841600  |
| Ir | 1.5707176 | 9.6019611  | 4.3620701  |
| Ir | 4.3206520 | 6.8461041  | 4.3731151  |
| Ir | 7.0544662 | 6.8495035  | 4.3825150  |
| Ir | 9.7900343 | 9.5857306  | 4.3670049  |
| Ir | 7.0470085 | 9.6138039  | 4.3933249  |
| Ir | 9.7948599 | 6.8641992  | 4.3707652  |
| Ir | 0.2005755 | 10.9598207 | 6.1945996  |
| Ir | 2.9463427 | 2.7285500  | 6.3149199  |
| Ir | 0.1662506 | 2.7465348  | 6.2021203  |
| Ir | 2.9054379 | 10.9363518 | 6.2030602  |
| Ir | 5.6927681 | 10.9462223 | 6.3024650  |
| Ir | 8.4327230 | 2.7333751  | 6.1943650  |
| Ir | 5.7183199 | 2.7329366  | 6.1896653  |
| Ir | 8.4616747 | 0.0054832  | 6.1976547  |
| Ir | 0.1811649 | 5.4965792  | 6.2032948  |
| Ir | 2.9445882 | 8.2306128  | 6.1997700  |
| Ir | 0.2085809 | 8.2216206  | 6.1997700  |
| Ir | 2.9058766 | 5.5298071  | 6.1948352  |
| Ir | 5.6566887 | 5.5110545  | 6.2289100  |
| Ir | 8.4218664 | 8.2333536  | 6.2115197  |
| Ir | 5.6838851 | 8.2290773  | 6.1971850  |
| Ir | 8.3996048 | 5.4716854  | 6.2188048  |
| O  | 7.7011547 | 1.3971193  | 9.3774405  |
| O  | 5.3529191 | 0.3688000  | 11.6489496 |
| O  | 4.3659430 | 9.1306248  | 9.3088207  |
| O  | 5.1362233 | 3.7891104  | 13.2427206 |
| O  | 2.5567067 | 3.0912087  | 12.2171803 |
| O  | 7.2221422 | 2.5909216  | 11.8900595 |
| O  | 2.8865759 | 2.9858217  | 8.4231052  |
| O  | 9.8044004 | 6.8020191  | 11.6705704 |
| O  | 0.9821508 | 3.9840932  | 10.1155748 |
| O  | 4.1175542 | 7.4105449  | 12.7024555 |
| O  | 9.5390139 | 10.4544888 | 10.1395454 |
| O  | 7.8574257 | 8.4220858  | 9.4705000  |
| O  | 9.4016047 | 4.1669030  | 11.1970444 |
| O  | 5.5651193 | 0.2696638  | 8.3826847  |
| O  | 0.7122676 | 6.6013341  | 9.5334797  |

|   |            |            |            |
|---|------------|------------|------------|
| O | 3.2475896  | 1.3154197  | 10.3954601 |
| O | 6.4506559  | 8.8134766  | 11.7424803 |
| O | 8.3368769  | 5.8507938  | 9.3504152  |
| O | 1.2411771  | 10.7288685 | 9.3882504  |
| O | 2.0392020  | 8.5203447  | 10.7728701 |
| O | 10.8164892 | 9.3768206  | 12.2731104 |
| O | 5.7587852  | 4.9295068  | 8.2092552  |
| H | 8.4231825  | 0.7633711  | 9.6679001  |
| H | 8.0362883  | 1.8237123  | 8.5471849  |
| H | 5.7558250  | 10.4287176 | 11.7119303 |
| H | 6.0564137  | 1.0129664  | 11.8949947 |
| H | 4.0347581  | 8.8172045  | 8.4271002  |
| H | 3.6140869  | 9.0062656  | 9.9379148  |
| H | 5.1043110  | 4.7591982  | 13.3456497 |
| H | 4.2351141  | 3.5572810  | 12.9069042 |
| H | 2.7862334  | 2.3100722  | 11.6127596 |
| H | 2.0506070  | 2.7277825  | 12.9649496 |
| H | 6.4565778  | 3.1225729  | 12.2538404 |
| H | 7.1162066  | 2.4670014  | 10.9190397 |
| H | 2.0314159  | 3.3222709  | 8.8160248  |
| H | 3.2002149  | 2.2480023  | 9.0458555  |
| H | 10.2868128 | 6.8215394  | 10.8097649 |
| H | 10.1548862 | 7.5756993  | 12.1638355 |
| H | 0.0357505  | 3.8418589  | 10.3916998 |
| H | 1.5135825  | 3.7952518  | 10.9385443 |
| H | 3.3892758  | 7.7370143  | 12.1351652 |
| H | 4.9150310  | 7.8653216  | 12.3461952 |
| H | 9.0592337  | 9.6593151  | 9.7616653  |
| H | 10.3971348 | 10.5704041 | 9.6488647  |
| H | 7.4266653  | 8.5486374  | 8.5894852  |
| H | 8.1094341  | 7.4367542  | 9.4935293  |
| H | 9.5200415  | 4.9960728  | 11.7300253 |
| H | 8.6836348  | 3.6097004  | 11.6101751 |
| H | 6.4145765  | 0.6160924  | 8.8277750  |
| H | 5.1345782  | 10.4573402 | 8.8745403  |
| H | 0.9102112  | 5.6298208  | 9.6951599  |
| H | 0.6234398  | 6.7099013  | 8.5532951  |
| H | 4.0676570  | 0.8503347  | 10.7702856 |
| H | 2.5560486  | 0.6521719  | 10.1122856 |
| H | 6.8765907  | 8.6324215  | 10.8511248 |
| H | 7.1597433  | 8.6585217  | 12.3913145 |

|   |            |            |            |
|---|------------|------------|------------|
| H | 8.8083229  | 5.6760988  | 8.4992447  |
| H | 8.6530380  | 5.1536598  | 9.9912596  |
| H | 1.5362830  | 9.8250170  | 9.6963348  |
| H | 1.3788054  | 10.7442207 | 8.4000750  |
| H | 1.3772701  | 8.8277330  | 11.4477901 |
| H | 1.6080033  | 7.7330670  | 10.3080397 |
| H | 10.8311844 | 9.9253597  | 13.0756350 |
| H | 10.2695951 | 9.8669090  | 11.5831499 |
| H | 4.6069846  | 3.9881506  | 10.3630295 |
| H | 4.1153612  | 5.5559072  | 11.0734348 |
| H | 5.8359890  | 5.1680260  | 10.9101105 |
| H | 5.1612267  | 6.7421427  | 9.0900354  |
| H | 3.8500838  | 5.6425419  | 8.5946550  |
| H | 6.9633350  | 5.3555512  | 7.6525397  |
| C | 4.8543868  | 5.0551815  | 10.4314156 |
| C | 4.8617339  | 5.6821308  | 9.0637150  |

**Table S13.** Cartesian coordinates (in Å) of the R5's TS[gauche-CH<sub>3</sub>CHOH···H]<sup>‡</sup> in the explicit model

| Element | x         | y         | z         |
|---------|-----------|-----------|-----------|
| Ir      | 1.5819033 | 1.3708000 | 0.5127700 |
| Ir      | 4.3235035 | 4.1124001 | 0.5127700 |
| Ir      | 1.5819033 | 4.1124001 | 0.5127700 |
| Ir      | 4.3235035 | 1.3708000 | 0.5127700 |
| Ir      | 7.0651031 | 1.3708000 | 0.5127700 |
| Ir      | 9.8067026 | 4.1124001 | 0.5127700 |
| Ir      | 7.0651031 | 4.1124001 | 0.5127700 |
| Ir      | 9.8067026 | 1.3708000 | 0.5127700 |
| Ir      | 1.5819033 | 6.8540001 | 0.5127700 |
| Ir      | 4.3235035 | 9.5956001 | 0.5127700 |
| Ir      | 1.5819033 | 9.5956001 | 0.5127700 |
| Ir      | 4.3235035 | 6.8540001 | 0.5127700 |
| Ir      | 7.0651031 | 6.8540001 | 0.5127700 |
| Ir      | 9.8067026 | 9.5956001 | 0.5127700 |
| Ir      | 7.0651031 | 9.5956001 | 0.5127700 |
| Ir      | 9.8067026 | 6.8540001 | 0.5127700 |
| Ir      | 0.2111032 | 0.0000000 | 2.4512849 |
| Ir      | 2.9527032 | 2.7416000 | 2.4512849 |
| Ir      | 0.2111032 | 2.7416000 | 2.4512849 |
| Ir      | 2.9527032 | 0.0000000 | 2.4512849 |
| Ir      | 5.6943030 | 0.0000000 | 2.4512849 |
| Ir      | 8.4359026 | 2.7416000 | 2.4512849 |
| Ir      | 5.6943030 | 2.7416000 | 2.4512849 |
| Ir      | 8.4359026 | 0.0000000 | 2.4512849 |
| Ir      | 0.2111032 | 5.4832001 | 2.4512849 |
| Ir      | 2.9527032 | 8.2248001 | 2.4512849 |
| Ir      | 0.2111032 | 8.2248001 | 2.4512849 |
| Ir      | 2.9527032 | 5.4832001 | 2.4512849 |
| Ir      | 5.6943030 | 5.4832001 | 2.4512849 |
| Ir      | 8.4359026 | 8.2248001 | 2.4512849 |
| Ir      | 5.6943030 | 8.2248001 | 2.4512849 |
| Ir      | 8.4359026 | 5.4832001 | 2.4512849 |
| Ir      | 1.5762007 | 1.3903203 | 4.3787551 |
| Ir      | 4.2862177 | 4.0889320 | 4.4182353 |
| Ir      | 1.5832193 | 4.1048331 | 4.4017849 |
| Ir      | 4.3194456 | 1.3751867 | 4.4083653 |
| Ir      | 7.0623617 | 1.3743093 | 4.3771100 |
| Ir      | 9.8158054 | 4.1162381 | 4.3484402 |

|    |           |            |            |
|----|-----------|------------|------------|
| Ir | 7.0369196 | 4.1298366  | 4.3766398  |
| Ir | 9.7984781 | 1.3688260  | 4.3538451  |
| Ir | 1.6062486 | 6.8261456  | 4.4050751  |
| Ir | 4.3356757 | 9.6161070  | 4.3686500  |
| Ir | 1.5726914 | 9.5845242  | 4.3566647  |
| Ir | 4.3262448 | 6.8545485  | 4.3733501  |
| Ir | 7.0625811 | 6.8633218  | 4.3648901  |
| Ir | 9.7997942 | 9.5844145  | 4.3608952  |
| Ir | 7.0572076 | 9.6207132  | 4.3818102  |
| Ir | 9.8300619 | 6.8654051  | 4.3653603  |
| Ir | 0.2091292 | 10.9606981 | 6.1821446  |
| Ir | 2.9850540 | 2.6895096  | 6.3285503  |
| Ir | 0.1399313 | 2.7440126  | 6.1920147  |
| Ir | 2.9127855 | 10.9383259 | 6.1788549  |
| Ir | 5.7009931 | 0.0037286  | 6.2984700  |
| Ir | 8.4306393 | 2.7439029  | 6.1981249  |
| Ir | 5.7263250 | 2.7530053  | 6.2000051  |
| Ir | 8.4674864 | 0.0016450  | 6.1962447  |
| Ir | 0.1939956 | 5.4868188  | 6.2108150  |
| Ir | 2.9705787 | 8.2559443  | 6.1931901  |
| Ir | 0.2109935 | 8.2272129  | 6.2096400  |
| Ir | 2.9347186 | 5.5411029  | 6.3407702  |
| Ir | 5.7764416 | 5.4908767  | 6.2220950  |
| Ir | 8.4300909 | 8.2255678  | 6.1995354  |
| Ir | 5.7018704 | 8.2532034  | 6.1793251  |
| Ir | 8.4594812 | 5.4822130  | 6.1715698  |
| O  | 7.7738619 | 1.2799982  | 9.3706255  |
| O  | 5.2023506 | 0.3397391  | 11.7690353 |
| O  | 4.4102473 | 9.0241413  | 9.2794456  |
| O  | 4.9130569 | 4.1681094  | 12.6187954 |
| O  | 2.2622588 | 3.0067675  | 12.1130753 |
| O  | 6.9060907 | 2.6024365  | 11.7227402 |
| O  | 2.2766247 | 2.3775156  | 8.3516655  |
| O  | 9.5396709 | 6.8050904  | 11.6017151 |
| O  | 0.5190397 | 3.7363625  | 10.0833797 |
| O  | 4.4411726 | 6.8547673  | 12.0428095 |
| O  | 9.5841951 | 10.2939405 | 10.1813755 |
| O  | 7.7631145 | 8.3923664  | 9.3929501  |
| O  | 8.9548330 | 4.2426810  | 11.0724955 |
| O  | 5.5595260 | 0.2404931  | 8.4045401  |
| O  | 0.4358048 | 6.4018550  | 9.5386505  |

|   |            |            |            |
|---|------------|------------|------------|
| O | 3.0701535  | 1.1083741  | 10.4840555 |
| O | 6.4076676  | 8.8122702  | 11.6724501 |
| O | 7.4879680  | 5.6251054  | 9.3170452  |
| O | 1.2392032  | 10.3946123 | 9.3710947  |
| O | 2.0760491  | 8.1348753  | 10.7404404 |
| O | 10.9218769 | 9.1815090  | 12.2662945 |
| O | 5.2209935  | 5.8814993  | 8.2130146  |
| H | 8.4827299  | 0.6463596  | 9.6841154  |
| H | 8.1088858  | 1.6536236  | 8.5124054  |
| H | 5.6716032  | 10.4327755 | 11.7608109 |
| H | 5.8818288  | 1.0457560  | 11.9048653 |
| H | 4.1223798  | 8.7529421  | 8.3641195  |
| H | 3.6396384  | 8.8434153  | 9.8645954  |
| H | 4.7985678  | 5.1466413  | 12.4951859 |
| H | 4.0096450  | 3.7936070  | 12.5045843 |
| H | 2.5468369  | 2.1865904  | 11.5871449 |
| H | 1.9332668  | 2.6888516  | 12.9715309 |
| H | 6.1429386  | 3.2339914  | 11.9123859 |
| H | 6.9509435  | 2.3789413  | 10.7644100 |
| H | 1.5394632  | 2.8961167  | 8.7687902  |
| H | 2.7921553  | 1.9014641  | 9.0780497  |
| H | 10.0925970 | 6.7615533  | 10.7803898 |
| H | 9.9841394  | 7.4937801  | 12.1440954 |
| H | 10.5246735 | 3.7125649  | 10.3494005 |
| H | 1.0285387  | 3.5286586  | 10.9152803 |
| H | 3.6071780  | 7.2294898  | 11.6863146 |
| H | 5.1307402  | 7.5515728  | 11.9027500 |
| H | 9.0732708  | 9.5278282  | 9.7950354  |
| H | 10.4401226 | 10.3703756 | 9.6744804  |
| H | 7.4186602  | 8.5946960  | 8.4827948  |
| H | 7.8091741  | 7.3947535  | 9.4190350  |
| H | 9.1366568  | 5.0526590  | 11.6205149 |
| H | 8.2932310  | 3.6495082  | 11.5363846 |
| H | 6.4326706  | 0.5297868  | 8.8324747  |
| H | 5.1440091  | 10.4085398 | 8.8689003  |
| H | 0.5439335  | 5.4121375  | 9.6688404  |
| H | 0.3163807  | 6.5368519  | 8.5601101  |
| H | 3.9296997  | 0.7226858  | 10.8729801 |
| H | 2.4491262  | 0.3781215  | 10.2069902 |
| H | 6.8115602  | 8.6825380  | 10.7608852 |
| H | 7.1333146  | 8.6164103  | 12.2919102 |

|   |            |            |            |
|---|------------|------------|------------|
| H | 7.8886795  | 5.4300132  | 8.4193449  |
| H | 7.9957118  | 5.0416927  | 9.9701099  |
| H | 1.5378183  | 9.4803429  | 9.6194897  |
| H | 1.3716774  | 10.4713764 | 8.3843298  |
| H | 1.4642339  | 8.5066366  | 11.4289894 |
| H | 1.5356250  | 7.4172344  | 10.2824249 |
| H | 0.0209458  | 9.7416725  | 13.0580101 |
| H | 10.3713627 | 9.6864014  | 11.5892601 |
| H | 4.2752509  | 3.6272466  | 9.3870754  |
| H | 2.7907295  | 4.4353604  | 9.9773951  |
| H | 4.3744969  | 5.0523300  | 10.4680748 |
| H | 3.3050537  | 6.4763174  | 8.6914749  |
| H | 3.3665752  | 4.4989657  | 7.5874448  |
| H | 5.9562907  | 5.5983477  | 8.8757143  |
| C | 3.8171847  | 4.5930576  | 9.6406403  |
| C | 3.8615985  | 5.5553589  | 8.4856148  |



**Table S14.** Cartesian coordinates (in Å) of the R6's TS[CH<sub>2</sub>⋯CO]<sup>‡</sup> in the explicit model

| Element | x          | y          | z         |
|---------|------------|------------|-----------|
| Ir      | 1.3675101  | 1.3687165  | 0.3201470 |
| Ir      | 4.1085620  | 4.1110840  | 0.3126533 |
| Ir      | 1.3676198  | 4.1103168  | 0.3166083 |
| Ir      | 4.1093297  | 1.3697034  | 0.3155675 |
| Ir      | 6.8513680  | 1.3713483  | 0.3122370 |
| Ir      | 9.5901165  | 4.1148129  | 0.3080738 |
| Ir      | 6.8499422  | 4.1126194  | 0.3101554 |
| Ir      | 9.5936260  | 1.3723353  | 0.3136941 |
| Ir      | 1.3669618  | 6.8527942  | 0.3132778 |
| Ir      | 4.1060395  | 9.5968065  | 0.3082820 |
| Ir      | 1.3652072  | 9.5952711  | 0.3128615 |
| Ir      | 4.1075749  | 6.8543291  | 0.3091146 |
| Ir      | 6.8489552  | 6.8568511  | 0.3068249 |
| Ir      | 9.5906649  | 9.6031666  | 0.3089065 |
| Ir      | 6.8479691  | 9.5999870  | 0.3066167 |
| Ir      | 9.5892391  | 6.8590450  | 0.3041188 |
| Ir      | 10.9623423 | 10.9651937 | 2.2614286 |
| Ir      | 2.7406130  | 2.7408323  | 2.2547674 |
| Ir      | 10.9654131 | 2.7410517  | 2.2587225 |
| Ir      | 2.7369940  | 0.0001097  | 2.2568491 |
| Ir      | 5.4769492  | 0.0027416  | 2.2528942 |
| Ir      | 8.2215099  | 2.7424772  | 2.2497716 |
| Ir      | 5.4815550  | 2.7413807  | 2.2514367 |
| Ir      | 8.2165756  | 0.0066895  | 2.2495635 |
| Ir      | 10.9653034 | 5.4826517  | 2.2564328 |
| Ir      | 2.7390778  | 8.2256775  | 2.2487309 |
| Ir      | 10.9638777 | 8.2237034  | 2.2528942 |
| Ir      | 2.7397356  | 5.4836388  | 2.2508125 |
| Ir      | 5.4805679  | 5.4851742  | 2.2470655 |
| Ir      | 8.2194262  | 8.2314892  | 2.2435269 |
| Ir      | 5.4791427  | 8.2285290  | 2.2451921 |
| Ir      | 8.2203035  | 5.4873672  | 2.2443595 |
| Ir      | 1.3763930  | 1.3903203  | 4.1781473 |
| Ir      | 4.0850935  | 4.1043944  | 4.2120771 |
| Ir      | 1.3824244  | 4.1065879  | 4.2016692 |
| Ir      | 4.1054912  | 1.3786957  | 4.2000036 |
| Ir      | 6.8493943  | 1.3665231  | 4.1529598 |
| Ir      | 9.5900078  | 4.1193089  | 4.1710701 |

|    |            |            |            |
|----|------------|------------|------------|
| Ir | 6.8459949  | 4.1161289  | 4.1635761  |
| Ir | 9.6064568  | 1.3682778  | 4.1390138  |
| Ir | 1.3701420  | 6.8245001  | 4.1741920  |
| Ir | 4.1281915  | 9.5985613  | 4.1898041  |
| Ir | 1.3598336  | 9.5940647  | 4.1517115  |
| Ir | 4.1153612  | 6.8711076  | 4.1864738  |
| Ir | 6.8277903  | 6.8944659  | 4.1827269  |
| Ir | 9.5862789  | 9.5833178  | 4.1523356  |
| Ir | 6.8328347  | 9.6031666  | 4.1916776  |
| Ir | 9.5753126  | 6.8431435  | 4.1879306  |
| Ir | 10.9624519 | 10.9660711 | 5.9926605  |
| Ir | 2.7345815  | 2.6740470  | 6.1006947  |
| Ir | 10.9260435 | 2.7357879  | 5.9932852  |
| Ir | 2.7131970  | 10.9297724 | 5.9909954  |
| Ir | 5.4818840  | 0.0605345  | 6.0734262  |
| Ir | 8.2199745  | 2.6828201  | 5.9839182  |
| Ir | 5.5039268  | 2.7473025  | 5.9810038  |
| Ir | 8.2635117  | 0.0006580  | 5.9749670  |
| Ir | 0.0103080  | 5.4850645  | 5.9959912  |
| Ir | 2.6869874  | 8.2516680  | 5.9789224  |
| Ir | 10.9592724 | 8.2285290  | 6.0043173  |
| Ir | 2.7403936  | 5.5459280  | 6.0728016  |
| Ir | 5.4785943  | 5.4791427  | 6.0272150  |
| Ir | 8.2324762  | 8.2562742  | 5.9995294  |
| Ir | 5.5147829  | 8.2072535  | 6.0757160  |
| Ir | 8.2782068  | 5.4855027  | 6.1623092  |
| O  | 6.6162486  | 5.4006228  | 7.7805300  |
| O  | 8.2060480  | 4.7621593  | 7.9016771  |
| O  | 8.6417427  | 4.2967453  | 8.9258146  |
| O  | 7.9290361  | 1.1783397  | 9.0540400  |
| O  | 5.1946740  | 0.5963528  | 11.4399471 |
| O  | 4.8582249  | 8.5914068  | 8.2624159  |
| O  | 4.9144826  | 4.4360185  | 10.6433258 |
| O  | 2.6388450  | 3.1431894  | 11.6820345 |
| O  | 6.9687090  | 2.6754727  | 11.1347876 |
| O  | 2.5242460  | 2.8670557  | 8.2724075  |
| O  | 8.9480343  | 6.4714923  | 10.5721359 |
| O  | 0.5786969  | 3.6962252  | 9.9699354  |
| O  | 4.5376773  | 7.2179751  | 10.4272585 |
| O  | 9.8581362  | 10.5176544 | 10.0409174 |
| O  | 8.0622787  | 8.6179457  | 9.4020805  |

|   |            |            |            |
|---|------------|------------|------------|
| O | 9.5108299  | 3.6583912  | 11.7650890 |
| O | 5.6640358  | 0.1119669  | 8.2068367  |
| O | 0.3572853  | 6.2724519  | 9.3602400  |
| O | 3.1415446  | 1.1685796  | 10.0026159 |
| O | 6.3401146  | 8.9997959  | 11.3862419 |
| O | 3.0361576  | 5.4092865  | 8.2420158  |
| O | 1.4812316  | 10.2398758 | 9.1443806  |
| H | 1.9889760  | 7.9948349  | 10.5350847 |
| H | 0.1432212  | 9.1960945  | 12.1227055 |
| H | 6.6131778  | 6.3137951  | 8.3866863  |
| H | 6.1853786  | 4.5342774  | 8.3088350  |
| H | 8.7081995  | 0.6511848  | 9.4166517  |
| H | 8.2530937  | 1.5867286  | 8.2053804  |
| H | 5.6567979  | 10.6909237 | 11.4455671 |
| H | 5.8926854  | 1.3102654  | 11.4243345 |
| H | 3.9273970  | 8.8174248  | 7.9772391  |
| H | 4.7721386  | 7.9207020  | 9.0438404  |
| H | 4.8296027  | 5.4184985  | 10.7111864 |
| H | 4.1311526  | 4.0596514  | 11.1166773 |
| H | 2.7704415  | 2.2631359  | 11.2076435 |
| H | 2.5008874  | 2.9467812  | 12.6245747 |
| H | 6.3105054  | 3.3989263  | 10.9362049 |
| H | 7.2934237  | 2.3182969  | 10.2657280 |
| H | 1.5846448  | 2.9784744  | 8.5987988  |
| H | 2.9402015  | 2.1239724  | 8.8927183  |
| H | 8.5622358  | 5.6612945  | 10.1678934 |
| H | 9.8715153  | 6.4633770  | 10.1699753 |
| H | 10.6711845 | 3.5546491  | 10.4464092 |
| H | 1.2557625  | 3.5862319  | 10.6924524 |
| H | 3.5818458  | 7.4895034  | 10.6162663 |
| H | 5.1318364  | 7.8145471  | 10.9668036 |
| H | 9.3117895  | 9.7443047  | 9.7134848  |
| H | 10.7215204 | 10.4947357 | 9.5427952  |
| H | 7.9699411  | 8.5537920  | 8.4102077  |
| H | 8.4007015  | 7.7197971  | 9.7542839  |
| H | 9.3785753  | 4.6188283  | 11.8858213 |
| H | 8.5936003  | 3.2990222  | 11.6162567 |
| H | 6.5742469  | 0.4308698  | 8.5301065  |
| H | 5.5159898  | 10.1284580 | 8.4753609  |
| H | 0.5123503  | 5.2827344  | 9.5173998  |
| H | 0.3194512  | 6.3946171  | 8.3752375  |

|   |            |            |            |
|---|------------|------------|------------|
| H | 4.0236821  | 0.8509927  | 10.4183083 |
| H | 2.5630672  | 0.3856883  | 9.7449160  |
| H | 6.9705729  | 8.9139290  | 10.6008625 |
| H | 6.8734107  | 8.7947235  | 12.1751614 |
| H | 2.9637794  | 4.4123311  | 8.4110403  |
| H | 3.9845316  | 5.6189642  | 8.3771105  |
| H | 1.7077974  | 9.3396444  | 9.5350933  |
| H | 1.5656730  | 10.1615763 | 8.1550064  |
| H | 1.4200392  | 8.3630867  | 11.2721720 |
| H | 1.4276060  | 7.2819090  | 10.0910835 |
| C | 0.2617680  | 9.7017546  | 12.9436798 |
| C | 10.6024256 | 9.7829065  | 11.4946918 |

**Table S15.** Cartesian coordinates (in Å) of the R7's TS[CH $\cdots$ CO] $^\ddagger$  in the explicit model

| Element | x         | y         | z         |
|---------|-----------|-----------|-----------|
| Ir      | 1.4007382 | 1.4064409 | 0.3773905 |
| Ir      | 4.1495762 | 4.1497955 | 0.3892555 |
| Ir      | 1.4036993 | 4.1527562 | 0.3780149 |
| Ir      | 4.1550593 | 1.4054538 | 0.3786394 |
| Ir      | 6.8764811 | 1.4054538 | 0.3815536 |
| Ir      | 9.6115017 | 4.1478214 | 0.3773905 |
| Ir      | 6.8754940 | 4.1434350 | 0.3873820 |
| Ir      | 9.6140242 | 1.4000803 | 0.3771823 |
| Ir      | 1.4125820 | 6.8750553 | 0.3748926 |
| Ir      | 4.1446414 | 9.6229067 | 0.3713539 |
| Ir      | 1.4028219 | 9.6166554 | 0.3734354 |
| Ir      | 4.1497955 | 6.8758235 | 0.3848841 |
| Ir      | 6.8791132 | 6.8750553 | 0.3761415 |
| Ir      | 9.6156683 | 9.6172037 | 0.3505381 |
| Ir      | 6.8733010 | 9.6225777 | 0.3632357 |
| Ir      | 9.6175327 | 6.8792229 | 0.3605296 |
| Ir      | 0.0279643 | 0.0330089 | 2.1960669 |
| Ir      | 2.7659454 | 2.7691259 | 2.2000220 |
| Ir      | 0.0330089 | 2.7729640 | 2.1966913 |
| Ir      | 2.7667131 | 0.0396984 | 2.1914873 |
| Ir      | 5.5205951 | 0.0354215 | 2.2272906 |
| Ir      | 8.2451983 | 2.7753766 | 2.2172990 |
| Ir      | 5.5169768 | 2.7750475 | 2.2302048 |
| Ir      | 8.2445393 | 0.0325702 | 2.2102215 |
| Ir      | 0.0294996 | 5.5244336 | 2.2152174 |
| Ir      | 2.7730734 | 8.2515583 | 2.2091808 |
| Ir      | 0.0323509 | 8.2437725 | 2.2131360 |
| Ir      | 2.7777894 | 5.5125899 | 2.2289557 |
| Ir      | 5.5201569 | 5.5171957 | 2.2383230 |
| Ir      | 8.2613182 | 8.2603312 | 2.1906548 |
| Ir      | 5.5202665 | 8.2585764 | 2.2110543 |
| Ir      | 8.2538614 | 5.5165381 | 2.2187562 |
| Ir      | 1.4119240 | 1.4279349 | 4.1789799 |
| Ir      | 4.1074653 | 4.1164575 | 4.1764817 |
| Ir      | 1.4169685 | 4.1323590 | 4.1652417 |
| Ir      | 4.1459575 | 1.3998609 | 4.2045832 |
| Ir      | 6.8852544 | 1.3906492 | 4.1977143 |
| Ir      | 9.6389170 | 4.1568136 | 4.1360993 |

|    |            |            |            |
|----|------------|------------|------------|
| Ir | 6.8804293  | 4.1578007  | 4.1523356  |
| Ir | 9.6224680  | 1.3887850  | 4.1571231  |
| Ir | 1.3898815  | 6.8694630  | 4.1400542  |
| Ir | 4.1523175  | 9.6402330  | 4.1589966  |
| Ir | 1.3918555  | 9.6357374  | 4.1302710  |
| Ir | 4.1398158  | 6.8836088  | 4.1483808  |
| Ir | 6.9012656  | 6.8994012  | 4.1604538  |
| Ir | 9.6135855  | 9.6388073  | 4.1681557  |
| Ir | 6.8852544  | 9.6633720  | 4.1952162  |
| Ir | 9.6318989  | 6.8910666  | 4.1515031  |
| Ir | 0.0610828  | 0.0330089  | 5.9672651  |
| Ir | 2.7638617  | 2.7653971  | 6.0956988  |
| Ir | 10.9575167 | 2.7791052  | 5.9760079  |
| Ir | 2.7429161  | 10.9575167 | 5.9601884  |
| Ir | 5.4675179  | 0.0275257  | 6.0534425  |
| Ir | 8.2621956  | 2.8046567  | 5.9541516  |
| Ir | 5.5409932  | 2.8177068  | 5.9755917  |
| Ir | 8.3056221  | 0.0357505  | 6.0546918  |
| Ir | 0.0460589  | 5.5204864  | 5.9778814  |
| Ir | 2.7480702  | 8.2567129  | 5.9574814  |
| Ir | 0.0489101  | 8.2561646  | 5.9768405  |
| Ir | 2.7557466  | 5.5452700  | 5.9785056  |
| Ir | 5.5017328  | 5.4827614  | 6.0738425  |
| Ir | 8.2821541  | 8.2483778  | 6.0359578  |
| Ir | 5.4760718  | 8.2528744  | 6.0775895  |
| Ir | 8.2959719  | 5.4755235  | 6.0057745  |
| O  | 5.8212943  | 6.8327250  | 7.4426889  |
| O  | 7.6124363  | 7.5803046  | 7.7184982  |
| O  | 7.8191533  | 7.6529021  | 8.9168644  |
| O  | 8.2227163  | 0.3502668  | 8.2291107  |
| O  | 5.3478746  | 10.7284288 | 11.0762949 |
| O  | 4.0836678  | 9.2043190  | 8.9133253  |
| O  | 5.1193347  | 3.3675621  | 12.1443539 |
| O  | 2.3594210  | 2.4893727  | 11.8995600 |
| O  | 7.0535884  | 1.8589146  | 11.0257130 |
| O  | 2.7632039  | 2.7432449  | 8.2476358  |
| O  | 8.6669655  | 5.3541255  | 10.8017349 |
| O  | 0.8557082  | 3.4614346  | 9.8379631  |
| O  | 4.0791717  | 7.0155349  | 10.4566088 |
| O  | 9.5515156  | 9.7185335  | 9.5877571  |
| O  | 7.0392222  | 3.8553476  | 9.1191940  |

|   |            |            |            |
|---|------------|------------|------------|
| O | 9.6806993  | 2.8263705  | 11.1841202 |
| O | 5.5624871  | 0.1456338  | 8.1502180  |
| O | 0.1057161  | 6.0141935  | 9.3999987  |
| O | 3.0357189  | 0.7562430  | 9.9786787  |
| O | 6.5004435  | 7.5948901  | 11.4705467 |
| O | 4.4981980  | 4.4746203  | 9.6701880  |
| O | 1.1489497  | 9.8357639  | 9.1616583  |
| H | 1.5374893  | 7.7682686  | 10.8011112 |
| H | 10.4418774 | 8.9371777  | 12.1483088 |
| H | 5.5334263  | 6.7621017  | 8.4982586  |
| H | 8.8423185  | 10.6545153 | 8.8109121  |
| H | 8.5414000  | 1.2710058  | 8.3467197  |
| H | 5.7375112  | 9.8777657  | 11.3504391 |
| H | 6.0777984  | 0.4447972  | 11.0558958 |
| H | 3.8306735  | 8.8645802  | 8.0140829  |
| H | 4.1786370  | 8.3890772  | 9.4886742  |
| H | 4.8530707  | 3.7940454  | 11.2896576 |
| H | 4.2804055  | 2.9483166  | 12.4330683 |
| H | 2.5655894  | 1.7127323  | 11.2931957 |
| H | 1.7014370  | 2.1740887  | 12.5442257 |
| H | 6.4139180  | 2.3711550  | 11.6143827 |
| H | 7.0288048  | 2.4047122  | 10.1947460 |
| H | 1.8708678  | 2.9937174  | 8.6843519  |
| H | 3.0225594  | 1.8807375  | 8.7186975  |
| H | 8.0731344  | 4.9403634  | 10.1214743 |
| H | 9.4036884  | 5.7507801  | 10.2775927 |
| H | 10.9373388 | 3.0632443  | 10.1364613 |
| H | 1.4307861  | 3.2971580  | 10.6433258 |
| H | 3.2039435  | 7.2541642  | 10.8729248 |
| H | 4.8462715  | 7.1692843  | 11.0762949 |
| H | 9.1608915  | 8.8517485  | 9.3117399  |
| H | 10.5398073 | 9.7414532  | 9.3150702  |
| H | 6.0830622  | 4.1535239  | 9.1824741  |
| H | 7.2498870  | 3.8420782  | 8.1527166  |
| H | 9.3451271  | 3.7691517  | 11.2113905 |
| H | 8.8440723  | 2.2965834  | 11.2130556 |
| H | 6.5239115  | 0.1771074  | 8.4085426  |
| H | 5.0835843  | 10.2986555 | 8.5823536  |
| H | 0.4411783  | 5.0729470  | 9.5136538  |
| H | 0.1002329  | 6.1791277  | 8.4226971  |
| H | 3.8754163  | 0.2990537  | 10.2750950 |

|   |            |           |            |
|---|------------|-----------|------------|
| H | 2.4062476  | 0.0377244 | 9.6955833  |
| H | 7.0016074  | 7.4976182 | 10.6281309 |
| H | 6.9639926  | 6.9798942 | 12.0708742 |
| H | 3.8571024  | 4.0316873 | 9.0659056  |
| H | 4.2021050  | 5.4097252 | 9.8589878  |
| H | 1.4404366  | 9.0246897 | 9.6953754  |
| H | 1.3880173  | 9.6667719 | 8.2157879  |
| H | 0.9137204  | 8.1217155 | 11.4901123 |
| H | 1.0157080  | 7.0644455 | 10.3009062 |
| C | 10.2428370 | 9.4297876 | 12.9609585 |
| C | 9.9610004  | 9.3832903 | 11.4118462 |



**Table S16.** Cartesian coordinates (in Å) of the R6's TS[CH<sub>2</sub>···CO]<sup>#</sup> in the gas-phase model

| Element | x         | y          | z         |
|---------|-----------|------------|-----------|
| Ir      | 1.3721160 | 1.3671811  | 0.3203552 |
| Ir      | 4.1150322 | 4.1093297  | 0.3166083 |
| Ir      | 1.3727740 | 4.1093297  | 0.3176491 |
| Ir      | 4.1148129 | 1.3675101  | 0.3184817 |
| Ir      | 6.8590450 | 1.3675101  | 0.3199388 |
| Ir      | 9.6010838 | 4.1104259  | 0.3222286 |
| Ir      | 6.8591542 | 4.1097679  | 0.3184817 |
| Ir      | 9.6019611 | 1.3675101  | 0.3247265 |
| Ir      | 1.3734319 | 6.8523550  | 0.3151512 |
| Ir      | 4.1156898 | 9.5952711  | 0.3143186 |
| Ir      | 1.3732126 | 9.5949421  | 0.3151512 |
| Ir      | 4.1156898 | 6.8531227  | 0.3145267 |
| Ir      | 6.8597026 | 6.8538904  | 0.3170246 |
| Ir      | 9.6026182 | 9.5973549  | 0.3226449 |
| Ir      | 6.8599219 | 9.5966969  | 0.3178573 |
| Ir      | 9.6017408 | 6.8538904  | 0.3207715 |
| Ir      | 0.0013160 | 10.9655228 | 2.2618446 |
| Ir      | 2.7428064 | 2.7394068  | 2.2549756 |
| Ir      | 0.0010966 | 2.7401745  | 2.2574735 |
| Ir      | 2.7433548 | 10.9658518 | 2.2593470 |
| Ir      | 5.4859414 | 0.0013160  | 2.2587225 |
| Ir      | 8.2277613 | 2.7402840  | 2.2589307 |
| Ir      | 5.4861612 | 2.7396259  | 2.2545593 |
| Ir      | 8.2280903 | 0.0023029  | 2.2608039 |
| Ir      | 0.0021933 | 5.4821033  | 2.2560163 |
| Ir      | 2.7443419 | 8.2251291  | 2.2512288 |
| Ir      | 0.0020836 | 8.2235937  | 2.2528942 |
| Ir      | 2.7434642 | 5.4826517  | 2.2524776 |
| Ir      | 5.4863801 | 5.4829807  | 2.2522695 |
| Ir      | 8.2283096 | 8.2250195  | 2.2564328 |
| Ir      | 5.4869285 | 8.2258968  | 2.2520614 |
| Ir      | 8.2268839 | 5.4828711  | 2.2570572 |
| Ir      | 1.3688260 | 1.3665231  | 4.1837678 |
| Ir      | 4.1121807 | 4.1137161  | 4.2110362 |
| Ir      | 1.3652072 | 4.1116323  | 4.2052078 |
| Ir      | 4.0954022 | 1.3704710  | 4.1700292 |
| Ir      | 6.8588252 | 1.3769412  | 4.1906371 |
| Ir      | 9.5904465 | 4.1144834  | 4.2176971 |

|    |            |           |           |
|----|------------|-----------|-----------|
| Ir | 6.8472009  | 4.1054912 | 4.2287297 |
| Ir | 9.6106243  | 1.3748575 | 4.1793962 |
| Ir | 1.3650975  | 6.8578382 | 4.2091627 |
| Ir | 4.1272044  | 9.5863886 | 4.2045832 |
| Ir | 1.3690454  | 9.6009741 | 4.1912613 |
| Ir | 4.1336751  | 6.8637605 | 4.2358069 |
| Ir | 6.8456655  | 6.8468719 | 4.2293544 |
| Ir | 9.5810146  | 9.5818920 | 4.2099957 |
| Ir | 6.8579483  | 9.5909948 | 4.2072897 |
| Ir | 9.5679646  | 6.8579483 | 4.2428846 |
| Ir | 0.0018643  | 0.0058122 | 6.0440755 |
| Ir | 2.7341428  | 2.7128682 | 6.0415773 |
| Ir | 0.0078958  | 2.7145131 | 6.0455327 |
| Ir | 2.7377617  | 0.0063605 | 6.0392876 |
| Ir | 5.4800196  | 0.0322412 | 6.0284638 |
| Ir | 8.2341213  | 2.6988311 | 6.0438671 |
| Ir | 5.4668603  | 2.7001469 | 6.0324187 |
| Ir | 8.2260065  | 0.0270870 | 6.0295048 |
| Ir | 10.9521437 | 5.4783750 | 6.0802956 |
| Ir | 2.7207639  | 8.2522163 | 6.0459490 |
| Ir | 0.0180946  | 8.2503519 | 6.0494876 |
| Ir | 2.7160482  | 5.4799104 | 6.0715528 |
| Ir | 5.4276004  | 5.4531522 | 6.1398282 |
| Ir | 8.2909279  | 8.2612085 | 6.1317101 |
| Ir | 5.4127960  | 8.2647181 | 6.1219263 |
| Ir | 8.2254581  | 5.4462433 | 6.2116427 |
| C  | 5.7769904  | 5.3928366 | 8.0823584 |
| C  | 7.6858015  | 5.3842831 | 8.0921421 |
| O  | 8.0540533  | 5.3486423 | 9.2211914 |
| H  | 5.5880389  | 6.2970166 | 8.6766500 |
| H  | 5.6078882  | 4.4604735 | 8.6385565 |
